# Supplementary material for: Somatic Genomic and Transcriptomic Changes in Single Ischemic Human Heart Cardiomyocytes
Source: Research Square preprint supplement (doi:10.21203/rs.3.rs-5875531/v1), 2025-01-30
Supplement: Supplementary file 2 [file 2f24ca1b78e0c91ad9a00a55.xlsx]

## Sheet: ischemic-heart-CM
Cell_ID	Case_ID	Condition	age	gender	snv.called.per.cell	scan2.snv.burden.per.cell	scan2.snv.burden.per.gb	Coverage	Depth	MAPD	CoV	Utilized in downstream analysis
4402_A1	4402	Control	0.2	Male	70	196.016	33.5357	0.842	45.14	0.233836	1.19294	Y
4402_A3	4402	Control	0.2	Male	49	99.2931	16.9877	0.929	64.216	0.19807	1.51822	Y
1864_E3	1864	Control	2	Female	125	426.026	72.8872	0.925	43.495	0.276325	4.81845	Y
6032_A1	6032	Control	4	Male	143	289.846	49.5887	0.93	73.99	0.22219	1.13591	Y
6032_C7	6032	Control	4	Male	123	323.529	55.3515	0.391	37.729	0.624341	30.6794	Y
6032_E7	6032	Control	4	Male	156	457.943	78.3477	0.928	48.289	0.228855	1.93331	Y
4638_A1	4638	Control	15.1	Female	220	495.845	84.8323	0.93	57.649	0.188043	15.6386	Y
4638_A4	4638	Control	15.1	Female	392	954.513	163.304	0.929	42.665	0.205252	12.0504	Y
4638_B2	4638	Control	15.1	Female	283	873.925	149.517	0.924	42.018	0.271865	4.78499	Y
1863_C1	1863	Control	30	Female	109	274.877	47.0277	0.927	31.057	0.156673	7.03498	N
1863_C2	1863	Control	30	Female	206	649.991	111.205	0.927	25.953	0.194649	3.05639	N
1863_C3	1863	Control	30	Female	186	715.851	122.472	0.923	25.302	0.258802	3.07752	N
1863_C4	1863	Control	30	Female	199	1044.2	178.649	0.915	25.472	0.358359	2.7602	N
1863_C5	1863	Control	30	Female	213	742.28	126.994	0.926	27.116	0.331361	2.61567	N
1863_C6	1863	Control	30	Female	197	706.92	120.944	0.927	26.233	0.188883	2.59375	N
1863_C7	1863	Control	30	Female	207	702.691	120.221	0.926	26.16	0.196177	2.74296	N
1863_C8	1863	Control	30	Female	264	914.273	156.42	0.926	26.298	0.201593	3.80866	N
1610_A1	1610	Control	44	Female	failed QC	failed QC	failed QC	0.001	0.202	1.58209	213.255	N
1610_A2	1610	Control	44	Female	failed QC	failed QC	failed QC	0.001	0.196	1.30342	209.753	N
1610_A3	1610	Control	44	Female	failed QC	failed QC	failed QC	0.001	0.171	1.5376	212.596	N
1610_A4	1610	Control	44	Female	failed QC	failed QC	failed QC	0.002	0.211	1.51544	209.192	N
1610_A5	1610	Control	44	Female	failed QC	failed QC	failed QC	0.001	0.205	1.48971	208.622	N
1610_A6	1610	Control	44	Female	failed QC	failed QC	failed QC	0.179	4.358	1.18146	187.002	N
1610_A7	1610	Control	44	Female	failed QC	failed QC	failed QC	0.001	0.228	1.55089	209.927	N
1039_A0	1039	Control	49	Male	375	1467.34	251.042	0.925	21.621	0.290168	2.8806	Y
1039_A1	1039	Control	49	Male	1823	15952.1	2729.18	0.638	24.859	0.702473	11.4672	N
1039_A2	1039	Control	49	Male	1325	4564.03	780.843	0.919	26.047	0.25887	2.87145	N
1039_A3	1039	Control	49	Male	333	1377.97	235.752	0.925	27.451	0.274787	2.43555	N
1039_A4	1039	Control	49	Male	333	1097.8	187.818	0.925	29.823	0.32037	3.3204	N
1039_A5	1039	Control	49	Male	1949	7077.77	1210.91	0.922	26.135	0.378717	2.63671	N
1039_A6	1039	Control	49	Male	391	1501.75	256.929	0.922	29.37	0.319129	2.36095	N
1039_A7	1039	Control	49	Male	639	2296.81	392.952	0.925	29.355	0.353638	2.92482	N
1940_B1	1940	Control	57	Male	49	199.134	34.069	0.925	26.443	0.165502	2.41517	N
1940_B2	1940	Control	57	Male	250	1108.67	189.679	0.921	25.731	0.321167	3.65977	N
1940_B3	1940	Control	57	Male	731	4000.81	684.484	0.864	24.721	0.410976	7.67475	N
1940_B4	1940	Control	57	Male	53	157.403	26.9296	0.925	27.003	0.175861	11.7171	N
1940_B5	1940	Control	57	Male	252	1120.95	191.779	0.921	25.131	0.286153	5.79241	N
1940_B6	1940	Control	57	Male	279	1210.08	207.029	0.923	24.979	0.24985	5.06029	N
1940_B7	1940	Control	57	Male	317	1515.82	259.337	0.913	24.452	0.296856	3.92557	N
1940_B8	1940	Control	57	Male	266	1285.71	219.967	0.91	23.599	0.299464	7.78195	N
5919_C4	5919	Control	63	Male	673	2265.49	387.594	0.844	49.492	0.537633	5.51338	Y
5919_D2	5919	Control	63	Male	841	2236.77	382.68	0.928	62.016	0.236474	1.53257	Y
5919_E3	5919	Control	63	Male	679	2155.65	368.802	0.927	45.111	0.245454	1.59868	Y
5919_F6	5919	Control	63	Male	492	1549.41	265.083	0.924	45.236	0.2798	2.24748	Y
5919_F2	5919	Control	63	Male	748	2569.94	439.682	0.93	40.781	0.208168	8.02319	N
5919_F3	5919	Control	63	Male	815	3498.56	598.556	0.909	26.785	0.401734	8.31792	N
5919_F4	5919	Control	63	Male	665	2315.39	396.131	0.919	30.309	0.335994	5.73246	N
5828_C2	5828	Control	66	Female	505	2528.34	432.564	0.922	30.115	0.354354	8.34438	Y
5828_G2	5828	Control	66	Female	611	2494.99	426.859	0.918	29.033	0.372343	1.87687	Y
5828_E1	5828	Control	66	Female	863	5468.18	935.531	0.797	24.354	0.527685	6.12962	N
5828_E2	5828	Control	66	Female	644	3067.92	524.879	0.856	24.719	0.451623	6.62484	N
5828_E3	5828	Control	66	Female	938	3782.96	647.212	0.906	32.58	0.399681	3.40701	N
5828_E4	5828	Control	66	Female	784	5420.8	927.426	0.789	21.412	0.525425	8.81685	N
5828_E5	5828	Control	66	Female	640	3311.32	566.522	0.849	21.987	0.452728	9.98659	N
5828_E6	5828	Control	66	Female	1657	10650.8	1822.21	0.829	22.999	0.470294	7.07524	N
5657_D1	5657	Control	82.2	Male	725	2674.85	457.631	0.555	60.696	0.702917	3.60643	Y
5657_H1	5657	Control	82.2	Male	839	2467.56	422.166	0.927	42.085	0.237714	2.4369	Y
1363_A4	1363	IHD	40	Female	634	2290.16	391.815	0.921	28.561	0.241642	1.34276	Y
1363_D4	1363	IHD	40	Female	866	3090.93	528.815	0.848	32.976	0.561056	4.41042	Y
1363_H4	1363	IHD	40	Female	884	3245.83	555.317	0.915	27.714	0.470605	4.1373	Y
1363_C2	1363	IHD	40	Female	failed QC	failed QC	failed QC	0.351	1.634	0.469355	6.31457	N
1363_C4	1363	IHD	40	Female	408	1461.04	249.963	0.925	27.602	0.28495	8.56259	N
1363_C6	1363	IHD	40	Female	713	2792.9	477.827	0.925	25.634	0.270195	7.02516	N
1673_A2	1673	IHD	42	Male	649	2466.96	422.063	0.908	28.698	0.341876	2.84356	Y
1673_A3	1673	IHD	42	Male	646	2122.45	363.122	0.926	28.143	0.217213	1.67037	Y
1673_D2	1673	IHD	42	Male	459	1947.75	333.234	0.886	29.897	0.386687	4.07625	Y
1673_E1	1673	IHD	42	Male	3097	10300.4	1762.25	0.924	26.499	0.294427	8.52547	N
1673_E3	1673	IHD	42	Male	1888	6911.43	1182.45	0.918	28.66	0.332535	7.87478	N
1673_E6	1673	IHD	42	Male	684	2831.72	484.468	0.899	30.852	0.410717	3.47324	N
1673_E7	1673	IHD	42	Male	643	2710.7	463.764	0.897	30.138	0.410967	3.06682	N
1673_E8	1673	IHD	42	Male	209	601.116	102.843	0.929	51.007	0.215915	3.75573	N
604_B2	604	IHD	43	Male	691	3868.55	661.856	0.868	27.277	0.717151	9.38457	Y
604_B3	604	IHD	43	Male	1095	6868.63	1175.13	0.852	24.235	0.914125	11.8265	Y
604_B6	604	IHD	43	Male	623	3127.23	535.027	0.883	26.97	0.647695	9.00477	Y
604_B7	604	IHD	43	Male	1543	12789.6	2188.13	0.737	20.706	0.926598	15.8857	N
604_B8	604	IHD	43	Male	701	4618.67	790.191	0.846	22.613	0.776926	16.0613	N
604_D2	604	IHD	43	Male	379	1861.93	318.551	0.92	17.246	0.28472	73.5494	N
604_D3	604	IHD	43	Male	398	1582.64	270.767	0.924	25.99	0.286441	8.15283	N
604_D5	604	IHD	43	Male	437	1527.81	261.388	0.927	36.062	0.289395	4.97053	N
1743_A3	1743	IHD	44	Female	681	2693.22	460.774	0.912	29.789	0.297717	2.06602	Y
1743_C3	1743	IHD	44	Female	1043	5726.09	979.656	0.913	26.669	0.317222	5.59107	Y
1743_F3	1743	IHD	44	Female	5766	20072.3	3434.1	0.921	28.336	0.291571	2.06706	Y
1743_B1	1743	IHD	44	Female	6751	41950.8	7177.21	0.906	24.853	0.369077	6.63038	N
1743_B2	1743	IHD	44	Female	failed QC	failed QC	failed QC	0.259	1.204	0.386546	18.3934	N
1113_D1	1113	IHD	56	Male	635	1997.13	341.682	0.925	28.334	0.211921	3.18667	Y
1113_E1	1113	IHD	56	Male	707	2317.56	396.503	0.925	28.447	0.26436	3.3168	Y
1113_F1	1113	IHD	56	Male	1309	4456.77	762.492	0.919	28.51	0.310889	4.25528	Y
1113_A7	1113	IHD	56	Male	224	933.227	159.662	0.926	25.954	0.229602	9.9488	N
1113_A8	1113	IHD	56	Male	3149	10783.4	1844.9	0.897	24.971	0.296578	8.57059	N
1113_A9	1113	IHD	56	Male	1817	6961.29	1190.98	0.794	27.504	0.371826	8.8517	N
1113_G1	1113	IHD	56	Male	732	2707.7	463.251	0.921	39.633	0.27307	11.6065	N
1113_H1	1113	IHD	56	Male	1314	7651.07	1308.99	0.922	21.966	0.26753	12.439	N

## Sheet: hiPSC-CM
Cell_ID	Condition	snv.called.per.cell	scan2.snv.burden.per.cell	scan2.snv.burden.per.gb	Coverage	Depth	MAPD	CoV	Utilized in downstream analysis
A1	Normoxia	225	865.05	147.998	0.914	24.979	0.255078	3.79999	Y
A2	Normoxia	125	484.096	82.8222	0.876	19.637	0.326651	6.01704	Y
A3	Normoxia	142	750.288	128.364	0.818	16.62	0.415904	5.90723	Y
A6	Normoxia	236	1215.65	207.981	0.858	15.554	0.34575	5.1297	Y
A7	Normoxia	170	712.519	121.902	0.916	15.037	0.378496	1.54017	Y
A8	Normoxia	75	352.107	60.2407	0.872	14.254	0.323146	10.8107	Y
A9	Normoxia	142	699.627	119.697	0.918	14.733	0.284427	6.88877	Y
A11	Normoxia	224	861.426	147.378	0.824	28.313	0.439201	10.9	Y
A2n	Normoxia	269	873.93	149.517	0.9	48.96	0.337881	2.722	Y
B3	Hypoxia	101	320.985	54.9161	0.916	32.818	0.263079	5.18878	Y
B4	Hypoxia	353	1246.12	213.195	0.921	20.848	0.251699	7.82675	Y
B7	Hypoxia	192	804.565	137.65	0.904	21.038	0.460648	6.37383	Y
B8	Hypoxia	191	732.593	125.337	0.915	20.088	0.268412	2.87093	Y
B9	Hypoxia	154	685.745	117.322	0.916	17.474	0.253115	1.24766	Y
B10	Hypoxia	185	850.902	145.578	0.917	15.267	0.252679	2.62782	Y
B11	Hypoxia	217	1012.93	173.299	0.907	15.812	0.260257	0.896571	Y
B12	Hypoxia	308	1291.9	221.027	0.915	17.921	0.237491	4.21013	Y
B2n	Hypoxia	236	742.956	127.11	0.923	47.743	0.284711	2.15552	Y
