# Supplementary material for: Somatic Genomic and Transcriptomic Changes in Single Ischemic Human Heart Cardiomyocytes
Source: Research Square preprint supplement (doi:10.21203/rs.3.rs-5875531/v1), 2025-01-30
Supplement: Supplementary file 3 [file 2f2c159c486e782fdabb7f84.xlsx]

## Sheet: GO_enrichment downregulated
Accession	Category	Term	Percent Hits	P-value
GO:0034162	BP	toll-like receptor 9 signaling pathway	11.1111	0.00307669
GO:0048741	BP	skeletal muscle fiber development	8.82353	0.000446573
GO:0045662	BP	negative regulation of myoblast differentiation	8	0.00347255
GO:0014904	BP	myotube cell development	7.89474	0.000702246
GO:0003229	BP	ventricular cardiac muscle tissue development	5.17241	0.00369573
GO:0070884	BP	regulation of calcineurin-NFAT signaling cascade	5.12821	0.0154159
GO:0106056	BP	regulation of calcineurin-mediated signaling	5	0.0165656
GO:0033173	BP	calcineurin-NFAT signaling cascade	4.54545	0.0219636
GO:0045214	BP	sarcomere organization	4.44444	0.0265432
GO:0055010	BP	ventricular cardiac muscle tissue morphogenesis	4.25532	0.0283538
GO:0030239	BP	myofibril assembly	4.22535	0.00735899
GO:0003208	BP	cardiac ventricle morphogenesis	4.22535	0.00587927
GO:0045661	BP	regulation of myoblast differentiation	4.16667	0.00325007
GO:0055002	BP	striated muscle cell development	4.16667	0.0075567
GO:0006942	BP	regulation of striated muscle contraction	4.12371	0.000977339
GO:0003231	BP	cardiac ventricle development	4	0.000671608
GO:0000381	BP	regulation of alternative mRNA splicing, via spliceosome	3.77358	0.0290809
GO:0045445	BP	myoblast differentiation	3.7037	0.00147156
GO:0055001	BP	muscle cell development	3.68421	4.46651e-05
GO:0015804	BP	neutral amino acid transport	3.50877	0.0285898
GO:2000134	BP	negative regulation of G1/S transition of mitotic cell cycle	3.48837	0.00518964
GO:0010232	BP	vascular transport	3.48837	0.0150588
GO:0010232	BP	vascular transport	3.48837	0.0150588
GO:0015807	BP	L-amino acid transport	3.44828	0.00752659
GO:0032233	BP	positive regulation of actin filament bundle assembly	3.38983	0.0356128
GO:0001658	BP	branching involved in ureteric bud morphogenesis	3.33333	0.0325805
GO:0055008	BP	cardiac muscle tissue morphogenesis	3.27869	0.0460466
GO:0002931	BP	response to ischemia	3.27869	0.0303266
GO:0001656	BP	metanephros development	3.19149	0.0102017
GO:0007044	BP	cell-substrate junction assembly	3.15789	0.020286
GO:0001657	BP	ureteric bud development	3.06122	0.0103235
GO:0015909	BP	long-chain fatty acid transport	3.0303	0.0195767
GO:0003205	BP	cardiac chamber development	3.01205	0.00230688
GO:0032231	BP	regulation of actin filament bundle assembly	2.91262	0.0173097
GO:0001823	BP	mesonephros development	2.91262	0.0116602
GO:0000380	BP	alternative mRNA splicing, via spliceosome	2.85714	0.044443
GO:0006941	BP	striated muscle contraction	2.76243	0.0018436
GO:0051017	BP	actin filament bundle assembly	2.54777	0.0084778
GO:0061572	BP	actin filament bundle organization	2.54777	0.0084778
GO:0007519	BP	skeletal muscle tissue development	2.51572	0.0059814
GO:0014902	BP	myotube differentiation	2.5	0.0224259
GO:0050848	BP	regulation of calcium-mediated signaling	2.5	0.04859
GO:0000245	BP	spliceosomal complex assembly	2.46914	0.0339065
GO:0048738	BP	cardiac muscle tissue development	2.46914	0.00153349
GO:0010927	BP	cellular component assembly involved in morphogenesis	2.45902	0.0274585
GO:0031032	BP	actomyosin structure organization	2.43902	0.00622406
GO:0003206	BP	cardiac chamber morphogenesis	2.4	0.0271551
GO:0006937	BP	regulation of muscle contraction	2.39521	0.00539253
GO:0051146	BP	striated muscle cell differentiation	2.38908	0.000600501
GO:0007517	BP	muscle organ development	2.36686	0.000212519
GO:0060537	BP	muscle tissue development	2.36407	3.81043e-05
GO:0060538	BP	skeletal muscle organ development	2.35294	0.00754804
GO:0003007	BP	heart morphogenesis	2.32558	0.00210234
GO:0014706	BP	striated muscle tissue development	2.3166	0.0019961
GO:2000045	BP	regulation of G1/S transition of mitotic cell cycle	2.18579	0.00601776
GO:0006839	BP	mitochondrial transport	2.18579	0.00327218
GO:0006839	BP	mitochondrial transport	2.18579	0.00327218
GO:0006865	BP	amino acid transport	2.05479	0.0316918
GO:0006865	BP	amino acid transport	2.05479	0.0316918
GO:0000082	BP	G1/S transition of mitotic cell cycle	1.98413	0.00408659
GO:0003015	BP	heart process	1.97628	0.00584715
GO:0061061	BP	muscle structure development	1.93741	1.32098e-05
GO:0019722	BP	calcium-mediated signaling	1.93237	0.0137417
GO:0048754	BP	branching morphogenesis of an epithelial tube	1.92308	0.047498
GO:0006364	BP	rRNA processing	1.89573	0.00486281
GO:0044843	BP	cell cycle G1/S phase transition	1.81159	0.00599407
GO:0007006	BP	mitochondrial membrane organization	1.8018	0.0480236
GO:0006936	BP	muscle contraction	1.74927	0.00502248
GO:0007507	BP	heart development	1.67785	0.00110383
GO:0019932	BP	second-messenger-mediated signaling	1.66667	0.0114368
GO:0010959	BP	regulation of metal ion transport	1.54639	0.0050122
GO:0010959	BP	regulation of metal ion transport	1.54639	0.0050122
GO:0030029	BP	actin filament-based process	1.54242	0.000625855
GO:0030036	BP	actin cytoskeleton organization	1.45138	0.00267296
GO:0015849	BP	organic acid transport	1.44928	0.0131973
GO:0003012	BP	muscle system process	1.36054	0.014632
GO:0003013	BP	circulatory system process	1.34454	0.00610112
GO:0015711	BP	organic anion transport	1.14943	0.029216
GO:0044772	BP	mitotic cell cycle phase transition	1.08696	0.0419607
GO:0002253	BP	activation of immune response	1.002	0.0481926
GO:0030001	BP	metal ion transport	0.911162	0.0483531
GO:0006812	BP	monoatomic cation transport	0.901804	0.0332206
GO:0006812	BP	monoatomic cation transport	0.901804	0.0332206
GO:0015171	MF	amino acid transmembrane transporter activity	3.65854	0.00539185
GO:0003724	MF	RNA helicase activity	2.77778	0.0451569
GO:0015293	MF	symporter activity	2.7027	0.00501409
GO:0015294	MF	solute:monoatomic cation symporter activity	2.5641	0.0172917
GO:0099106	MF	ion channel regulator activity	2.3622	0.015443
GO:0003779	MF	actin binding	2.11268	0.000461673
GO:0005342	MF	organic acid transmembrane transporter activity	1.86335	0.029551
GO:0005342	MF	organic acid transmembrane transporter activity	1.86335	0.029551
GO:0015291	MF	secondary active transmembrane transporter activity	1.41844	0.0393952
GO:0008092	MF	cytoskeletal protein binding	1.2605	0.00354689
GO:0022890	MF	inorganic cation transmembrane transporter activity	1.1215	0.0459369

## Sheet: GO_enrichment_Upregulated
Accession	Category	Term	Percent Hits	P-value
GO:0150111	BP	regulation of transepithelial transport	50	9.32709e-05
GO:1904352	BP	positive regulation of protein catabolic process in the vacuole	40	0.00028858
GO:0035976	CC	transcription factor AP-1 complex	40	0.000197125
GO:2001188	BP	regulation of T cell activation via T cell receptor contact with antigen bound to MHC molecule on antigen presenting cell	33.3333	0.000204612
GO:0002291	BP	T cell activation via T cell receptor contact with antigen bound to MHC molecule on antigen presenting cell	20	0.000758749
GO:1904350	BP	regulation of protein catabolic process in the vacuole	18.1818	0.0014405
GO:0060211	BP	regulation of nuclear-transcribed mRNA poly(A) tail shortening	15.3846	0.00179008
GO:0060213	BP	positive regulation of nuclear-transcribed mRNA poly(A) tail shortening	15.3846	0.00179008
GO:0098974	BP	postsynaptic actin cytoskeleton organization	11.7647	0.00248423
GO:0090713	BP	immunological memory process	11.1111	0.00255397
GO:1900242	BP	regulation of synaptic vesicle endocytosis	11.1111	0.00389183
GO:0099188	BP	postsynaptic cytoskeleton organization	10	0.00348509
GO:0150105	BP	protein localization to cell-cell junction	9.09091	0.00591348
GO:0007039	BP	protein catabolic process in the vacuole	9.09091	0.00517625
GO:0035914	BP	skeletal muscle cell differentiation	7.14286	1.74459e-05
GO:0051602	BP	response to electrical stimulus	7.14286	0.000997123
GO:0000289	BP	nuclear-transcribed mRNA poly(A) tail shortening	6.89655	0.0088526
GO:0010575	BP	positive regulation of vascular endothelial growth factor production	6.66667	0.00880357
GO:0006221	BP	pyrimidine nucleotide biosynthetic process	6.45161	0.00708244
GO:0009218	BP	pyrimidine ribonucleotide metabolic process	6.45161	0.00755531
GO:0072539	BP	T-helper 17 cell differentiation	6.06061	0.00884214
GO:0006220	BP	pyrimidine nucleotide metabolic process	5.76923	0.00128939
GO:0001953	BP	negative regulation of cell-matrix adhesion	5.12821	0.0132856
GO:0071364	BP	cellular response to epidermal growth factor stimulus	5.12821	0.0155162
GO:0072528	BP	pyrimidine-containing compound biosynthetic process	5	0.0124783
GO:1903078	BP	positive regulation of protein localization to plasma membrane	5	0.00284095
GO:0140467	BP	integrated stress response signaling	5	0.0131927
GO:0070849	BP	response to epidermal growth factor	4.65116	0.0184304
GO:0050856	BP	regulation of T cell receptor signaling pathway	4.54545	0.0149542
GO:0120178	BP	steroid hormone biosynthetic process	4.54545	0.0151204
GO:0033120	BP	positive regulation of RNA splicing	4.44444	0.0175968
GO:0045214	BP	sarcomere organization	4.44444	0.0195065
GO:0150116	BP	regulation of cell-substrate junction organization	4.41176	0.00499348
GO:0072538	BP	T-helper 17 type immune response	4.34783	0.0179273
GO:0002455	BP	humoral immune response mediated by circulating immunoglobulin	4.25532	0.0175022
GO:0070527	BP	platelet aggregation	4.16667	0.00431575
GO:1904377	BP	positive regulation of protein localization to cell periphery	4.16667	0.00476996
GO:0010332	BP	response to gamma radiation	4.16667	0.0202026
GO:0030490	BP	maturation of SSU-rRNA	4.16667	0.0168699
GO:0002286	BP	T cell activation involved in immune response	4.06504	0.000155097
GO:1902041	BP	regulation of extrinsic apoptotic signaling pathway via death domain receptors	4	0.0209526
GO:1902895	BP	positive regulation of miRNA transcription	4	0.0241091
GO:1905477	BP	positive regulation of protein localization to membrane	3.9604	0.00130447
GO:0007519	BP	skeletal muscle tissue development	3.77358	9.35592e-05
GO:0000381	BP	regulation of alternative mRNA splicing, via spliceosome	3.77358	0.0270858
GO:1903076	BP	regulation of protein localization to plasma membrane	3.77358	0.00144292
GO:0072527	BP	pyrimidine-containing compound metabolic process	3.7037	0.00489565
GO:0002292	BP	T cell differentiation involved in immune response	3.57143	0.00578274
GO:0008625	BP	extrinsic apoptotic signaling pathway via death domain receptors	3.57143	0.00622477
GO:0038066	BP	p38MAPK cascade	3.57143	0.0242784
GO:0060538	BP	skeletal muscle organ development	3.52941	0.000136285
GO:0048008	BP	platelet-derived growth factor receptor signaling pathway	3.50877	0.0309315
GO:0042255	BP	ribosome assembly	3.44828	0.0217991
GO:0010574	BP	regulation of vascular endothelial growth factor production	3.44828	0.0142891
GO:1905517	BP	macrophage migration	3.33333	0.0228707
GO:0010573	BP	vascular endothelial growth factor production	3.22581	0.0175663
GO:0015695	BP	organic cation transport	3.22581	0.0308461
GO:0000288	BP	nuclear-transcribed mRNA catabolic process, deadenylation-dependent decay	3.1746	0.0353688
GO:0090109	BP	regulation of cell-substrate junction assembly	3.1746	0.0410471
GO:0051893	BP	regulation of focal adhesion assembly	3.1746	0.0410471
GO:0010812	BP	negative regulation of cell-substrate adhesion	3.1746	0.033879
GO:0034109	BP	homotypic cell-cell adhesion	3.15789	0.00976288
GO:0035904	BP	aorta development	3.07692	0.0403096
GO:0050854	BP	regulation of antigen receptor-mediated signaling pathway	3.07692	0.0311655
GO:0042542	BP	response to hydrogen peroxide	3.0303	0.00896901
GO:0042446	BP	hormone biosynthetic process	3.0303	0.0345967
GO:0070301	BP	cellular response to hydrogen peroxide	2.98507	0.0359605
GO:1904375	BP	regulation of protein localization to cell periphery	2.96296	0.0035458
GO:1902893	BP	regulation of miRNA transcription	2.94118	0.0441082
GO:0150115	BP	cell-substrate junction organization	2.94118	0.0155187
GO:0048488	BP	synaptic vesicle endocytosis	2.89855	0.0456802
GO:0014823	BP	response to activity	2.89855	0.0386727
GO:0061614	BP	miRNA transcription	2.89855	0.045235
GO:0014823	BP	response to activity	2.89855	0.0386727
GO:0000380	BP	alternative mRNA splicing, via spliceosome	2.85714	0.0435661
GO:0140238	BP	presynaptic endocytosis	2.85714	0.0474229
GO:0140238	BP	presynaptic endocytosis	2.85714	0.0474229
GO:0045600	BP	positive regulation of fat cell differentiation	2.85714	0.0359802
GO:1905475	BP	regulation of protein localization to membrane	2.82486	0.00140088
GO:0009988	BP	cell-cell recognition	2.8169	0.0327911
GO:0030239	BP	myofibril assembly	2.8169	0.0459163
GO:0055002	BP	striated muscle cell development	2.77778	0.046953
GO:0035924	BP	cellular response to vascular endothelial growth factor stimulus	2.77778	0.0362269
GO:0042093	BP	T-helper cell differentiation	2.73973	0.0406566
GO:0008652	BP	amino acid biosynthetic process	2.73973	0.0407924
GO:0002294	BP	CD4-positive, alpha-beta T cell differentiation involved in immune response	2.66667	0.0423356
GO:0002287	BP	alpha-beta T cell activation involved in immune response	2.63158	0.0432967
GO:0002293	BP	alpha-beta T cell differentiation involved in immune response	2.63158	0.0432967
GO:2000514	BP	regulation of CD4-positive, alpha-beta T cell activation	2.63158	0.0409432
GO:0000956	BP	nuclear-transcribed mRNA catabolic process	2.58621	0.0173326
GO:0035710	BP	CD4-positive, alpha-beta T cell activation	2.5641	0.0143079
GO:0045638	BP	negative regulation of myeloid cell differentiation	2.53165	0.0464641
GO:0000079	BP	regulation of cyclin-dependent protein serine/threonine kinase activity	2.46914	0.0485669
GO:0014855	BP	striated muscle cell proliferation	2.46914	0.047772
GO:0014855	BP	striated muscle cell proliferation	2.46914	0.047772
GO:0001952	BP	regulation of cell-matrix adhesion	2.43902	0.0214372
GO:0002285	BP	lymphocyte activation involved in immune response	2.42718	0.00186395
GO:0001523	BP	retinoid metabolic process	2.38095	0.0478111
GO:0007041	BP	lysosomal transport	2.32558	0.0237091
GO:0014910	BP	regulation of smooth muscle cell migration	2.29885	0.046953
GO:0014910	BP	regulation of smooth muscle cell migration	2.29885	0.046953
GO:0006986	BP	response to unfolded protein	2.29008	0.0202035
GO:0042129	BP	regulation of T cell proliferation	2.25989	0.00674181
GO:0030168	BP	platelet activation	2.25564	0.022983
GO:0043484	BP	regulation of RNA splicing	2.24719	0.00953126
GO:0045598	BP	regulation of fat cell differentiation	2.12766	0.0215863
GO:0071456	BP	cellular response to hypoxia	2.0979	0.0232898
GO:0007517	BP	muscle organ development	2.07101	0.000977573
GO:0002687	BP	positive regulation of leukocyte migration	2.05479	0.0230122
GO:0002263	BP	cell activation involved in immune response	2.0339	0.00168684
GO:0000302	BP	response to reactive oxygen species	2.03046	0.00956835
GO:0034614	BP	cellular response to reactive oxygen species	2	0.025973
GO:0050657	BP	nucleic acid transport	1.98675	0.0345094
GO:0050658	BP	RNA transport	1.98675	0.0345094
GO:0030217	BP	T cell differentiation	1.97368	0.00252818
GO:0035966	BP	response to topologically incorrect protein	1.97368	0.030564
GO:0035966	BP	response to topologically incorrect protein	1.97368	0.030564
GO:0051236	BP	establishment of RNA localization	1.94805	0.0366141
GO:0036294	BP	cellular response to decreased oxygen levels	1.94805	0.029061
GO:0042594	BP	response to starvation	1.94175	0.0149568
GO:0042098	BP	T cell proliferation	1.92308	0.0119243
GO:0010810	BP	regulation of cell-substrate adhesion	1.86916	0.018847
GO:0007034	BP	vacuolar transport	1.82927	0.0430444
GO:0072659	BP	protein localization to plasma membrane	1.82482	0.00937189
GO:0061061	BP	muscle structure development	1.78838	4.7586e-05
GO:0002685	BP	regulation of leukocyte migration	1.78571	0.0144557
GO:0009267	BP	cellular response to starvation	1.77515	0.0433315
GO:0071453	BP	cellular response to oxygen levels	1.76471	0.0376391
GO:0002573	BP	myeloid leukocyte differentiation	1.73913	0.0189016
GO:0050670	BP	regulation of lymphocyte proliferation	1.71674	0.0173584
GO:0002366	BP	leukocyte activation involved in immune response	1.71233	0.00832627
GO:0097529	BP	myeloid leukocyte migration	1.7094	0.0139948
GO:0046631	BP	alpha-beta T cell activation	1.70455	0.0419145
GO:0032944	BP	regulation of mononuclear cell proliferation	1.68776	0.0184417
GO:0045580	BP	regulation of T cell differentiation	1.67598	0.0452711
GO:0045444	BP	fat cell differentiation	1.66667	0.0204669
GO:0033002	BP	muscle cell proliferation	1.65975	0.0164204
GO:0006694	BP	steroid biosynthetic process	1.65746	0.0407017
GO:0060537	BP	muscle tissue development	1.65485	0.00329102
GO:0042110	BP	T cell activation	1.63934	0.000629703
GO:0002822	BP	regulation of adaptive immune response based on somatic recombination of immune receptors built from immunoglobulin superfamily domains	1.63043	0.04396
GO:1902107	BP	positive regulation of leukocyte differentiation	1.63043	0.048019
GO:1903708	BP	positive regulation of hemopoiesis	1.63043	0.048019
GO:0050863	BP	regulation of T cell activation	1.61725	0.00540275
GO:0032956	BP	regulation of actin cytoskeleton organization	1.5873	0.0159161
GO:1902105	BP	regulation of leukocyte differentiation	1.57729	0.0129848
GO:0008202	BP	steroid metabolic process	1.5625	0.0116636
GO:0071214	BP	cellular response to abiotic stimulus	1.54321	0.0173637
GO:0070663	BP	regulation of leukocyte proliferation	1.52672	0.0252655
GO:1903706	BP	regulation of hemopoiesis	1.51899	0.00811229
GO:1990778	BP	protein localization to cell periphery	1.48368	0.0210268
GO:0030099	BP	myeloid cell differentiation	1.48148	0.00949863
GO:1903131	BP	mononuclear cell differentiation	1.46751	0.00517157
GO:0009259	BP	ribonucleotide metabolic process	1.46199	0.014842
GO:0070661	BP	leukocyte proliferation	1.45349	0.0149304
GO:0019693	BP	ribose phosphate metabolic process	1.42857	0.0160995
GO:0043434	BP	response to peptide hormone	1.41844	0.0128754
GO:0030098	BP	lymphocyte differentiation	1.41176	0.0117602
GO:0030100	BP	regulation of endocytosis	1.40351	0.0379078
GO:0032970	BP	regulation of actin filament-based process	1.40056	0.026228
GO:1901652	BP	response to peptide	1.38067	0.00817578
GO:0001666	BP	response to hypoxia	1.37931	0.0402475
GO:0072521	BP	purine-containing compound metabolic process	1.36054	0.0108653
GO:1901653	BP	cellular response to peptide	1.3587	0.0272335
GO:0031625	MF	ubiquitin protein ligase binding	1.35135	0.0463188
GO:0016055	BP	Wnt signaling pathway	1.34228	0.0180841
GO:1903037	BP	regulation of leukocyte cell-cell adhesion	1.34048	0.0220361
GO:0198738	BP	cell-cell signaling by wnt	1.3363	0.0185672
GO:0046651	BP	lymphocyte proliferation	1.3245	0.0385127
GO:0007162	BP	negative regulation of cell adhesion	1.31148	0.0438453
GO:0002521	BP	leukocyte differentiation	1.30933	0.0056593
GO:0036293	BP	response to decreased oxygen levels	1.30293	0.0485135
GO:0031647	BP	regulation of protein stability	1.30293	0.0479538
GO:0050900	BP	leukocyte migration	1.2987	0.0224446
GO:0032943	BP	mononuclear cell proliferation	1.2945	0.0414281
GO:0055086	BP	nucleobase-containing small molecule metabolic process	1.29151	0.00782105
GO:0009117	BP	nucleotide metabolic process	1.27932	0.0142965
GO:0060326	BP	cell chemotaxis	1.27389	0.0369559
GO:0071417	BP	cellular response to organonitrogen compound	1.26183	0.00857873
GO:0006753	BP	nucleoside phosphate metabolic process	1.25523	0.0155367
GO:0009150	BP	purine ribonucleotide metabolic process	1.24224	0.0470358
GO:0046394	BP	carboxylic acid biosynthetic process	1.23839	0.0451551
GO:0001944	BP	vasculature development	1.23457	0.00255441
GO:0016053	BP	organic acid biosynthetic process	1.22699	0.0463888
GO:0007159	BP	leukocyte cell-cell adhesion	1.22249	0.0312663
GO:0051249	BP	regulation of lymphocyte activation	1.222	0.0197266
GO:0009896	BP	positive regulation of catabolic process	1.21317	0.0118765
GO:0002694	BP	regulation of leukocyte activation	1.2069	0.0127122
GO:0006163	BP	purine nucleotide metabolic process	1.20482	0.0311083
GO:0030097	BP	hemopoiesis	1.20482	0.0024208
GO:1901699	BP	cellular response to nitrogen compound	1.20482	0.0110606
GO:0046649	BP	lymphocyte activation	1.1734	0.0062466
GO:0010035	BP	response to inorganic substance	1.16959	0.0263753
GO:0030155	BP	regulation of cell adhesion	1.1509	0.00887597
GO:0008380	BP	RNA splicing	1.13122	0.0433599
GO:0071363	BP	cellular response to growth factor stimulus	1.12518	0.0138225
GO:0050865	BP	regulation of cell activation	1.10585	0.0195403
GO:0009611	BP	response to wounding	1.10294	0.0349926
GO:0090407	BP	organophosphate biosynthetic process	1.10092	0.0316613
GO:0030335	BP	positive regulation of cell migration	1.08303	0.0341685
GO:0070848	BP	response to growth factor	1.07962	0.0173651
GO:0043549	BP	regulation of kinase activity	1.07527	0.041681
GO:0043086	BP	negative regulation of catalytic activity	1.07066	0.0446219
GO:0051338	BP	regulation of transferase activity	1.05422	0.0292106
GO:0072657	BP	protein localization to membrane	1.0453	0.0471739
GO:0030029	BP	actin filament-based process	1.02828	0.0314258
GO:0045596	BP	negative regulation of cell differentiation	1.02339	0.0282919
GO:0019637	BP	organophosphate metabolic process	1.01695	0.0148985
GO:0030036	BP	actin cytoskeleton organization	1.01597	0.0452536
GO:0048514	BP	blood vessel morphogenesis	1.01597	0.0274167
GO:0060284	BP	regulation of cell development	0.988875	0.0331891
GO:0006417	BP	regulation of translation	0.974659	0.0441576
GO:0045321	BP	leukocyte activation	0.969828	0.0191854
GO:0060341	BP	regulation of cellular localization	0.945378	0.0302665
GO:0000165	BP	MAPK cascade	0.938338	0.0464013
GO:0051248	BP	negative regulation of protein metabolic process	0.924025	0.0171024
