# Supplementary material for: Somatic Genomic and Transcriptomic Changes in Single Ischemic Human Heart Cardiomyocytes
Source: Research Square preprint supplement (doi:10.21203/rs.3.rs-5875531/v1), 2025-01-30
Supplement: Supplementary file 4 [file 5d98e437b008fa6186b7ca2c.xlsx]

## Sheet: DEG_analysis_filtered
Celltype	Gene	Avg_log2FC	P_val_adj	Regulation
Cardiomyocyte	EGR1	6.65262	0	UP
Cardiomyocyte	ZFP36	4.28149	1.45882e-298	UP
Cardiomyocyte	AC023494.1	4.19785	0	UP
Cardiomyocyte	CCBE1	4.06033	0	UP
Cardiomyocyte	FOS	3.99906	0	UP
Cardiomyocyte	BTG2	3.53278	0	UP
Cardiomyocyte	DOK6	3.42741	5.59635e-269	UP
Cardiomyocyte	NR4A1	3.1586	0	UP
Cardiomyocyte	ZNF608	2.89227	1.11895e-191	UP
Cardiomyocyte	PDGFD	2.65536	1.70292e-137	UP
Cardiomyocyte	ADAMTS6	2.4739	1.55918e-240	UP
Cardiomyocyte	MTCH1	2.45912	3.63532e-302	UP
Cardiomyocyte	SCHIP1	2.45558	3.69369e-151	UP
Cardiomyocyte	MAP1LC3A	2.45069	9.09253e-164	UP
Cardiomyocyte	FTL	2.42811	1.36327e-59	UP
Cardiomyocyte	EIF1B	2.16846	8.36414e-199	UP
Cardiomyocyte	ITM2B	2.15312	7.28932e-96	UP
Cardiomyocyte	CRYAB	2.14497	6.11407e-256	UP
Cardiomyocyte	MIR133A1HG	2.12806	7.93088e-297	UP
Cardiomyocyte	JUNB	2.09832	1.41008e-66	UP
Cardiomyocyte	CD81	2.07234	5.3005e-23	UP
Cardiomyocyte	NME3	2.05684	2.13469e-90	UP
Cardiomyocyte	PNRC1	1.98216	7.06274e-84	UP
Cardiomyocyte	SLC38A2	1.97011	3.80903e-219	UP
Cardiomyocyte	HSPB3	1.95467	3.58319e-134	UP
Cardiomyocyte	CORIN	1.9333	1.84271e-299	UP
Cardiomyocyte	GADD45G	1.91818	4.90246e-63	UP
Cardiomyocyte	LRP1	1.9036	4.99877e-62	UP
Cardiomyocyte	NREP	1.89044	8.65889e-167	UP
Cardiomyocyte	SPSB3	1.88946	9.95298e-54	UP
Cardiomyocyte	WNT9A	1.77062	1.05569e-80	UP
Cardiomyocyte	S100A1	1.7678	2.36677e-84	UP
Cardiomyocyte	PPDPF	1.76329	1.64325e-57	UP
Cardiomyocyte	ZC2HC1A	1.75777	2.59552e-36	UP
Cardiomyocyte	MAML3	1.74666	1.83025e-106	UP
Cardiomyocyte	UBC	1.73256	2.06974e-134	UP
Cardiomyocyte	ACTG1	1.7254	2.05729e-136	UP
Cardiomyocyte	SLC4A7	1.71184	1.61083e-87	UP
Cardiomyocyte	CYP4V2	1.70206	2.40319e-98	UP
Cardiomyocyte	LAPTM4A	1.67317	2.61035e-21	UP
Cardiomyocyte	AASS	1.65854	1.13543e-166	UP
Cardiomyocyte	ZNF330	1.6509	2.21137e-120	UP
Cardiomyocyte	ANKRD36B	1.5766	2.22603e-26	UP
Cardiomyocyte	LGALS3	1.5764	1.87912e-24	UP
Cardiomyocyte	NINL	1.55898	4.93932e-62	UP
Cardiomyocyte	RPS8	1.52902	7.02355e-40	UP
Cardiomyocyte	ACTB	1.5242	3.18295e-264	UP
Cardiomyocyte	RPS14	1.49047	3.99262e-25	UP
Cardiomyocyte	PTPN20	1.47471	2.17403e-64	UP
Cardiomyocyte	SBDS	1.43003	3.76596e-32	UP
Cardiomyocyte	C9orf72	1.39492	3.07616e-54	UP
Cardiomyocyte	DNAJB4	1.3925	4.93678e-44	UP
Cardiomyocyte	ARL15	1.3864	2.04859e-186	UP
Cardiomyocyte	LGR4	1.35689	2.13821e-49	UP
Cardiomyocyte	PKNOX2	1.31941	1.84092e-24	UP
Cardiomyocyte	MYL6	1.31781	1.08871e-64	UP
Cardiomyocyte	SIPA1L2	1.3115	4.88416e-161	UP
Cardiomyocyte	ART3	1.29931	7.82921e-89	UP
Cardiomyocyte	RACK1	1.28473	4.68313e-10	UP
Cardiomyocyte	PRKAR1A	1.26581	1.02916e-107	UP
Cardiomyocyte	CD46	1.25934	2.68083e-27	UP
Cardiomyocyte	LPCAT4	1.20338	9.11126e-36	UP
Cardiomyocyte	HSF2	1.20057	3.93857e-35	UP
Cardiomyocyte	FGF14	1.16684	8.44773e-50	UP
Cardiomyocyte	ASB15	1.15509	3.05093e-101	UP
Cardiomyocyte	HBP1	1.12875	6.63924e-56	UP
Cardiomyocyte	SPATA6	1.08536	2.70892e-07	UP
Cardiomyocyte	HSD17B12	1.06209	7.25305e-19	UP
Cardiomyocyte	WDFY2	1.0588	5.8222e-35	UP
Cardiomyocyte	PTEN	1.04977	1.21619e-26	UP
Cardiomyocyte	RORA	1.04443	2.08932e-61	UP
Cardiomyocyte	DSTN	1.01981	1.88915e-63	UP
Cardiomyocyte	PIK3R1	0.953703	5.31533e-115	UP
Cardiomyocyte	GAREM1	0.876306	5.53788e-57	UP
Cardiomyocyte	DPYD	0.869991	3.31471e-56	UP
Cardiomyocyte	CAPN7	0.84881	4.80583e-40	UP
Cardiomyocyte	ANKRD36	0.84502	1.63496e-30	UP
Cardiomyocyte	OSBPL9	0.827403	7.1803e-67	UP
Cardiomyocyte	METAP1	0.78139	8.83893e-09	UP
Cardiomyocyte	YTHDC1	0.736682	5.12587e-17	UP
Cardiomyocyte	CSGALNACT1	0.733138	3.56675e-47	UP
Cardiomyocyte	RBFOX1	0.720485	2.27365e-125	UP
Cardiomyocyte	UBR3	0.539962	1.62526e-50	UP
Cardiomyocyte	SCAF11	-0.504866	4.15321e-15	DOWN
Cardiomyocyte	CHCHD3	-0.559791	9.31537e-68	DOWN
Cardiomyocyte	NEBL	-0.646281	0	DOWN
Cardiomyocyte	DPF3	-0.696561	2.23702e-150	DOWN
Cardiomyocyte	PSD3	-0.727733	1.59487e-192	DOWN
Cardiomyocyte	BSG	-0.767379	5.3545e-53	DOWN
Cardiomyocyte	DST	-0.794026	0	DOWN
Cardiomyocyte	ST3GAL6	-0.813846	4.68301e-41	DOWN
Cardiomyocyte	PDE10A	-0.821771	3.37556e-32	DOWN
Cardiomyocyte	TMEM38B	-0.824651	2.63009e-18	DOWN
Cardiomyocyte	DDX10	-0.835508	2.10917e-41	DOWN
Cardiomyocyte	SLC1A3	-0.851806	1.4244e-95	DOWN
Cardiomyocyte	COMMD1	-0.86512	5.22301e-93	DOWN
Cardiomyocyte	BACH1	-0.872022	6.11789e-59	DOWN
Cardiomyocyte	DDX5	-0.87735	1.45443e-43	DOWN
Cardiomyocyte	VIPR2	-0.911323	2.66567e-29	DOWN
Cardiomyocyte	CPED1	-0.946809	2.36029e-102	DOWN
Cardiomyocyte	MACROD1	-0.956614	5.97084e-62	DOWN
Cardiomyocyte	SLC38A1	-0.970222	5.83128e-58	DOWN
Cardiomyocyte	SYNPO	-0.978481	2.41082e-11	DOWN
Cardiomyocyte	NNT-AS1	-0.98879	5.62979e-32	DOWN
Cardiomyocyte	WDR60	-0.993617	7.19553e-168	DOWN
Cardiomyocyte	GRAMD4	-1.00402	8.77999e-39	DOWN
Cardiomyocyte	OBSCN	-1.01404	2.65826e-293	DOWN
Cardiomyocyte	ARIH2	-1.02435	2.08338e-54	DOWN
Cardiomyocyte	NACC2	-1.03029	1.61615e-24	DOWN
Cardiomyocyte	SCN5A	-1.06218	1.01545e-201	DOWN
Cardiomyocyte	ZNF106	-1.07088	1.53149e-132	DOWN
Cardiomyocyte	GALNT18	-1.11055	1.39911e-19	DOWN
Cardiomyocyte	ATXN7L1	-1.11297	6.94856e-26	DOWN
Cardiomyocyte	RCAN1	-1.11781	4.91599e-46	DOWN
Cardiomyocyte	CCDC40	-1.12891	1.83937e-17	DOWN
Cardiomyocyte	AHDC1	-1.14216	4.37421e-40	DOWN
Cardiomyocyte	SHROOM3	-1.18127	3.88277e-102	DOWN
Cardiomyocyte	MXRA7	-1.18138	1.90751e-55	DOWN
Cardiomyocyte	PPP1R13L	-1.18211	2.26159e-120	DOWN
Cardiomyocyte	ALPK3	-1.19044	7.87872e-169	DOWN
Cardiomyocyte	DUSP27	-1.19179	1.60314e-70	DOWN
Cardiomyocyte	INSR	-1.20377	2.6906e-267	DOWN
Cardiomyocyte	SLC15A4	-1.20489	3.72696e-08	DOWN
Cardiomyocyte	INPP4B	-1.23728	9.09566e-244	DOWN
Cardiomyocyte	OGDH	-1.23839	2.88599e-197	DOWN
Cardiomyocyte	SPG11	-1.24102	1.05291e-91	DOWN
Cardiomyocyte	MYO18A	-1.25569	4.31642e-198	DOWN
Cardiomyocyte	BCAR1	-1.25731	6.56898e-17	DOWN
Cardiomyocyte	MYBPC3	-1.33763	0	DOWN
Cardiomyocyte	GREB1L	-1.3939	2.76531e-161	DOWN
Cardiomyocyte	MET	-1.40063	6.78868e-13	DOWN
Cardiomyocyte	BCL2	-1.41428	3.23382e-35	DOWN
Cardiomyocyte	CES2	-1.41684	9.97042e-16	DOWN
Cardiomyocyte	MASP1	-1.45235	3.56833e-29	DOWN
Cardiomyocyte	PCNX4	-1.49318	9.45238e-87	DOWN
Cardiomyocyte	SRSF6	-1.56035	7.23328e-15	DOWN
Cardiomyocyte	URB1	-1.56163	3.40273e-21	DOWN
Cardiomyocyte	SLC2A12	-1.5743	3.52421e-69	DOWN
Cardiomyocyte	FILIP1L	-1.63751	1.60955e-276	DOWN
Cardiomyocyte	C10orf71	-1.65549	2.09851e-53	DOWN
Cardiomyocyte	SH2B3	-1.70953	1.53466e-21	DOWN
Cardiomyocyte	SLC25A20	-1.72846	4.68252e-56	DOWN
Cardiomyocyte	RRP12	-1.74421	1.87957e-69	DOWN
Cardiomyocyte	FLG-AS1	-1.74882	2.17059e-51	DOWN
Cardiomyocyte	LINC01004	-1.76827	1.20752e-73	DOWN
Cardiomyocyte	TNNI3	-1.85377	0	DOWN
Cardiomyocyte	FAM107A	-1.86387	1.52143e-102	DOWN
Cardiomyocyte	NMRK2	-1.86944	1.55117e-102	DOWN
Cardiomyocyte	PVR	-1.87641	4.43331e-34	DOWN
Cardiomyocyte	GALNT17	-1.89638	0	DOWN
Cardiomyocyte	CPT1B	-1.89685	2.18973e-61	DOWN
Cardiomyocyte	TMEM120B	-1.91369	1.32526e-118	DOWN
Cardiomyocyte	SYNPO2L	-1.9906	8.13981e-40	DOWN
Cardiomyocyte	SYNDIG1	-2.07511	2.53138e-204	DOWN
Cardiomyocyte	KCNAB2	-2.46566	7.31352e-73	DOWN
Cardiomyocyte	UBA6-AS1	-2.46582	1.70617e-151	DOWN
Cardiomyocyte	KIF26B	-2.48599	2.08888e-100	DOWN
Cardiomyocyte	RMRP	-2.75279	8.72224e-47	DOWN
Cardiomyocyte	HS6ST3	-3.08159	9.46528e-61	DOWN
Cardiomyocyte	LINC01428	-3.28043	8.33326e-271	DOWN
Cardiomyocyte	ANKRD2	-3.50685	2.5984e-155	DOWN
Cardiomyocyte	SLC35F1	-3.62479	2.01853e-54	DOWN
Cardiomyocyte	TOGARAM2	-4.42423	0	DOWN
