# Supplementary material for: Somatic Genomic and Transcriptomic Changes in Single Ischemic Human Heart Cardiomyocytes
Source: Research Square preprint supplement (doi:10.21203/rs.3.rs-5875531/v1), 2025-01-30
Supplement: Supplementary file 5 [file 600c8ca45a48950aa631800f.xlsx]

## Sheet: Sheet1
Tissue	Cell Type	Sequencing method	Donor age (in Years)	SNVs/cell/year		References
Appendix	Crypt	LCM-seq	38∼78	∼56		Moore et al,2021
Small Intestine	Crypt	LCM-seq	47∼78	∼49		Moore et al,2022
Colorectal	Crypt	LCM-seq	13∼71	∼47		Cagan et al, 2022
Uterine	adult stem cell	LCM-seq	19∼81	∼29		Moore et al,2020
Lung	bronchial basal cell	scMDA	11∼86	∼28		Huang etal, 2022
Liver	Hepatocyte	scMDA	0∼77	∼52		Brazhnik et al, 2020
Skin	oesophageal epithelium	Bulk	23∼80	∼42		Yokoyama et al, 2019
Visceral adipose tissue	pre-adipocyte	single-cell colony	30∼69	∼27		Franco et al. 2019
Blood mononuclear cells	B lymphocyte	SCMDA	0∼106	∼25		Zhang et al, 2019
Prefrontal cortex	neuron	MDA	0∼83	∼23		Lodato et al, 2018
Colon/Bladder	smooth muscle	NanoSeq	25∼78	∼21		Abascal et al, 2021
Prefrontal cortex	Neuron	META-CS	19∼76	∼16		Xing et al,2021
Prefrontal cortex/Hippocampus	neuron	PTA	0∼104	∼15		Miller et al, 2022
Heart	Cardiomyocytes	MDA	0.4∼82	∼124		Choudhury et al, 2022
