# Supplementary material for: Somatic Genomic and Transcriptomic Changes in Single Ischemic Human Heart Cardiomyocytes
Source: Research Square preprint supplement (doi:10.21203/rs.3.rs-5875531/v1), 2025-01-30
Supplement: Supplementary file 6 [file 6079e8b6fe51a7c2d8cb5cec.docx]

**Table 2a. Case information analyzed in this study for sequencing.** HW, heart weight; BW, body weight;RIN, RNA integrity number; PMI, postmortem interval.

| **Case ID** | **Age (Yr)** | **Height (inch, in range)** | **HW (gm)** | **BW (lbs., in range)** | **Sex** | **Diagnosis** | **Cause of Death** | **Hypertrophy/**  **Fibrosis?** | **RIN** | **PMI**  **(hr)** | **Number of cells included in signature analysis** |
| --- | --- | --- | --- | --- | --- | --- | --- | --- | --- | --- | --- |
| 4402 | 0.2 | 20-25 | 42 | 15-20 | M | Normal | Co-Sleeping | no | 6.7 | N/A | 2 |
| 1864 | 2 | 35-40 | 59 | 30-35 | F | Normal | Laryngitis & bronchiolitis associated with beta hemolytic streptococcus group A infection | no | 7.2 | 8 | 1 |
| 6032 | 4 | 40-45 | 110 | 55-60 | M | Normal | Head & neck injuries, accident | no | 7 | 25 | 3 |
| 4638 | 15.1 | 50-60 | 200 | 100-110 | F | Normal | MVA/ Chest Injuries | no | 9.6 | 5 | 3 |
| 1863* | 30 | 65-70 | 300 | 125-130 | F | Normal | Multiple injuries, accident | no | 8.8 | 7 |  |
| 1039 | 35 | 70-75 | 450 | 225-230 | M | Normal | Multiple injuries, accident | no | 8.4 | 12 | 1 |
| 1940* | 39 | 65-70 | 228 | 125-130 | F | Normal | Accident | no | 8.9 | 21 |  |
| 936**#** | 49.2 | 65-70 | 280 | 155-160 | F | Normal | Liver cirrhosis | no | 7.8 | 7 |  |
| 5919 | 63 | 70-75 | 430 | 185-190 | M | Normal | Drowning | no | 6.1 | 12 | 4 |
| 5828 | 66 | 60-65 | 320 | 140-150 | F | Normal | Accident | no | 8.2 | 18 | 2 |
| 5657 | 82.2 | 70-75 | 700 | 235-240 | M | Hypertrophy | Natural death | no; LV 1.8cm, Septum 1.8cm, RV 0.2cm | 8.4 | 22 | 2 |
| 1363 | 40 | 60-70 | 560 | 210-230 | F | IHD | Acute Coronary Artery Thrombosis/ASCVD | Fibrosis | N/A | 14 | 3 |
| 1673 | 42 | 70-75 | 500 | 230-250 | M | IHD | ASCVD | Fibrosis | 7.7 | 28 | 3 |
| 604**#** | 43 | 60-65 | 470 | 160-185 | M | IHD | ASCVD | Fibrosis | 7.5 | 15 | 3 |
| 1743 | 44 | 60-70 | 560 | 190-220 | F | IHD | ASCVD | Fibrosis | 7.1 | 23 | 3 |
| 5087**#** | 44 | 70-80 | 610 | 250-270 | M | Normal | Heroin intoxication | No | 8.1 | 4 |  |
| 1156**#** | 45 | 60-65 | 470 | 175-190 | F | Ischemic sudden cardiac death, Gastrointestinal Hemorrhage | Ischemic sudden cardiac death | Yes | 7.1 | 14 |  |
| 5364**#** | 47 | 60-65 | NA | 170-175 | M | Ischemic sudden cardiac death | Ischemic sudden cardiac death, Subarachnoid Hemorrhage, ruptured intracranial aneurysm | Yes | 6.4 | 10 |  |
| 5111**#** | 48 | 60-70 | 470 | 165-175 | F | Ischemic sudden cardiac death | Ischemic sudden cardiac death Pulmonary thromboembolism | Yes | 5.7 | 9 |  |
| 1113 | 56 | 60-70 | 710 | 190-230 | M | IHD | ASCVD | Yes | 7.7 | 17 | 3 |
| 5874**#** | 63 | 60-70 | 340 | 165-170 | F | Normal | Asthma | Yes | 6.5 | 25 |  |
| 5919 | 63 | 70-75 | 430 | 185-190 | M | Normal | Drowning | no | 6.1 | 12 |  |

* The donors were not included in the signature analysis, **#** The donors were used for snRNAseq analysis

**Table 2b.** **Criteria for selecting ID cases:**

| **Case ID** | **Age**  **(Yr)** | **Gender** | **Left anterior**  **calcification** | **Right anterior calcification** | **Smoking habit** | **HW**  **(gm)** | **BW (lbs., in range)** | **Height (inch, in range)** | **BMI** | **Reason for death** |
| --- | --- | --- | --- | --- | --- | --- | --- | --- | --- | --- |
| 604**#** | 43 | Male | 80% | 20% | Smoker Drinker | 470 | 160-185 | 60-65 | 25.1 | IHD |
| 1156**#** | 45 | Female | NA | NA | Smoker | NA | 175-190 | 60-65 | 29.9 | Ischemic sudden cardiac death |
| 5364**#** | 47 | Male | NA | Na | Smoker | NA | 170-175 | 60-65 | 26 | Ischemic sudden cardiac death |
| 5111**#** | 48 | Female | 30% | 50% | Heavy Smoker | 470 | 165-175 | 60-70 | 24.8 | Ischemic sudden cardiac death |
| 1113 | 56 | Male | 90% | 60% | Heavy smoker | 710 | 190-230 | 60-70 | 30.7 | IHD |
| 1673 | 42 | Male | 100% | 70-80% | Smoker | 500 | 230-250 | 70-75 | 30.4 | IHD |
| 1743 | 44 | Female | 75% | 40% | Smoker | 560 | 190-220 | 60-70 | 34.1 | IHD |
| 1363 | 40 | Female | 60% | 80% | Smoker | 560 | 210-230 | 60-70 | 34.1 | IHD |
| 5874**#** | 63 | Female | NA | NA | Smoker | 340 | 165-175 | 60-70 | 24.5 | Asthma |

**#** The donors were used for snRNAseq analysis, NA- information not available.
