# Supplementary material for: Somatic Genomic and Transcriptomic Changes in Single Ischemic Human Heart Cardiomyocytes
Source: Research Square preprint supplement (doi:10.21203/rs.3.rs-5875531/v1), 2025-01-30
Supplement: Supplementary file 7 [file 68c81356ddb2deae2e945bfd.xlsx]

## Sheet: Sheet1
Cardiomyocyte Markers	Fibroblast Markers	Hypoxia Markers	Collagen Markers	Fibrotic Markers
TNNT2	DCN	JUN	COL4A2	COL3A1
ACTN2	MMP2	NR4A1	COL6A1	S100A4
MYOZ2	LUM	ZEB1	COL6A2	PDGFRB
MYPN		ZEB2	COL21A1
MLIP
