# Supplementary material for: Somatic Genomic and Transcriptomic Changes in Single Ischemic Human Heart Cardiomyocytes
Source: Research Square preprint supplement (doi:10.21203/rs.3.rs-5875531/v1), 2025-01-30
Supplement: Supplementary file 9 [file 9eb17ce49674b42f37cdd388.xlsx]

## Sheet: Sheet 1
Type	SBS1	SBS2	SBS3	SBS4	SBS5	SBS6	SBS7a	SBS7b	SBS7c	SBS7d	SBS8	SBS9	SBS10a	SBS10b	SBS11	SBS12	SBS13	SBS14	SBS15	SBS16	SBS17a	SBS17b	SBS18	SBS19	SBS20	SBS21	SBS22	SBS23	SBS24	SBS25	SBS26	SBS27	SBS28	SBS29	SBS30	SBS31	SBS32	SBS33	SBS34	SBS35	SBS36	SBS37	SBS38	SBS39	SBS40	SBS41	SBS42	SBS43	SBS44
A[C>A]A	0.000886157	5.80017e-07	0.0208083	0.0421965	0.0119976	0.000425233	6.70435e-05	0.00232939	0.00483041	4.03938e-05	0.0440982	0.000557954	0.00219017	0.000181997	0.000146208	0.00452059	0.00181992	0.00112049	0.000944202	0.015995	0.00207026	0.000607958	0.0515339	0.00126938	0.000619283	0.000156993	0.00601276	0.000835523	0.0364134	0.00989847	0.000873118	0	0.000783905	0.0632093	0.00179968	0.00953498	0.0222978	0.00311136	0.00486795	0.00882695	0.0251938	0.00395082	0.0127949	0.0117015	0.0282038	0.00211019	0.00116025	0.0295063	7.68195e-18
A[C>A]C	0.0022804	0.000148004	0.0165066	0.0332972	0.00943811	0.000524287	0.000179116	0.000460879	0.0011501	0.000764883	0.0477981	0.00408966	0.00177014	0.00653991	0.000552786	0.00113015	0.000720968	0.0131058	0.000497106	0.0028991	0.000918116	0.000128991	0.0158104	0.000640688	0.00139064	0.00235989	9.54439e-05	0.00039925	0.0265098	0.00699892	0.000528071	0	0.00252969	0.0512075	0.00050591	0.0184903	0.0187981	0.00223097	0.00695707	0.046184	0.00831795	0.0014503	0.010096	0.00715093	0.0134018	0.00122011	0.0206045	0.00590126	0.000150038
A[C>A]G	0.000177031	5.23015e-05	0.0017507	0.0155987	0.00184963	5.20285e-05	7.12462e-05	0.000185951	0.000377032	0.000249962	0.00461981	0.000425965	0.000150012	5.34993e-05	9.4234e-05	0.000540071	0.000263988	0.000413181	4.61099e-05	0.00101968	4.7606e-05	5.8196e-05	0.0024316	0.00024588	2.181e-05	0.000293986	0.000765352	9.85617e-08	0.0148054	0.00144978	0.000114015	0	0.000352957	0.0192028	9.12838e-05	0.00165913	0.00445955	0.000414181	5.19781e-05	0.00138952	0.00223945	0.00106022	0.00189924	0.00267035	0.00292039	6.14056e-05	3.34073e-05	0.000626134	9.16232e-07
A[C>A]T	0.00128023	9.78028e-05	0.0122049	0.0294976	0.00660868	0.000180099	0.000248161	0.000709813	0.00196016	0.00404938	0.0469981	0.00304975	0.0170013	1.62998e-05	0.000266379	0.00122016	0.000347985	0.0826363	0.00111024	0.0105967	6.18078e-05	0.000455969	0.0214141	0.000570722	0.00124057	0.000620971	0.00172079	5.61351e-18	0.0220081	0.00496923	0.000619084	0	0.00396952	0.0356052	0.000555901	0.0062767	0.0145985	0.00190083	0.00122948	0.0215925	0.0178956	0.00185038	0.00884645	0.00740096	0.014802	0.00133012	0.00797173	0.00207044	0.00578146
A[C>G]A	0.00186033	2.23006e-16	0.0197079	0.00688943	0.010098	0.000471258	6.49421e-05	8.55774e-06	0.00112009	0.00117982	0.00432983	0.0048396	2.23017e-16	0.000304996	0.000170242	0.00122016	0.00386983	2.22097e-16	0.000113024	0.00173946	0.00101013	0.00014599	0.00173114	0.00318845	0.00877402	1.68992e-05	0.00166076	5.74359e-18	0.00334123	0.00802876	0.000427058	0	0.000153981	0.00314046	0.00106981	0.00831563	0.0019898	0.00141062	0.000761679	0.00357876	0.00183955	0.0343071	0.00268892	0.0473061	0.0122016	0.00533049	0.000406088	0.000361077	0.00318081
A[C>G]C	0.00122022	0.000133004	0.0117047	0.00283976	0.00569886	0.000289158	2.1614e-05	0.00018895	0.000319027	0.00254961	0.00294988	0.00195984	2.43019e-05	0.000133998	0.000290413	0.000642084	0.000950958	5.78254e-06	0.000269058	0.00200938	0.000569072	4.3397e-05	0.0025917	0.00178913	0.00151069	0.000718966	0.00019509	4.08255e-05	0.00367135	0.00163975	0.000378051	0	0.000223973	0.00263039	0.000466917	0.00315834	0.0020298	0.00130057	0.00112952	0.00454843	0.00166959	0.0112023	0.00157937	0.0225029	0.00868115	0.00316029	0.00050611	3.13067e-05	0.000233059
A[C>G]G	0.00011502	1.52004e-05	0.000253101	0.00127989	0.00171966	2.22122e-16	5.0833e-05	0.000504867	2.22019e-16	0.000905861	0.000285988	0.00135989	2.23017e-16	2.21997e-16	5.96849e-05	7.51098e-05	0.000263988	3.91172e-05	3.07066e-05	0.000846737	0.000152019	2.22985e-16	0.00192126	0.0006157	0.000469215	2.2199e-16	0.000231106	2.86179e-18	0.000920339	1e-18	6.83092e-05	0	2.21973e-16	0.000896131	0.000130977	0.00299842	0.00112989	0.000253111	2.21907e-16	0.00034588	0.000499877	0.00535111	0.000635745	0.0136018	0.0022503	0.00121011	1.77038e-05	0.00443094	3.1408e-05
A[C>G]T	0.0011402	9.12026e-05	0.017407	0.00354971	0.010098	0.000254139	9.56621e-05	0.000284925	0.00193016	0.00290955	0.00570977	0.00640947	2.23017e-16	2.21997e-16	0.000535762	0.00144019	0.00399982	0.00020409	0.00032507	0.0114964	1.96025e-05	0.000318978	0.00408268	0.00213896	0.00442202	6.18971e-05	6.20285e-05	5.61351e-18	0.00285105	0.00342947	0.000728098	0	8.32899e-05	0.00249036	0.00073087	0.00377801	0.00174983	0.00130057	0.00202915	0.00947672	0.00190953	0.0188039	0.00243902	0.0434056	0.0146019	0.00827076	0.000431094	0.000354076	0.00329083
A[C>T]A	0.0250044	6.11018e-05	0.0142057	0.00869928	0.0325935	0.0641351	0.000122079	0.00140963	0.00133011	0.00332949	0.00680972	0.00809933	0.00104008	0.000548992	0.0258367	0.00551072	0.00717968	0.0124054	0.00505108	0.00175945	0.00122015	0.000570961	0.00920605	0.0279864	0.0493226	0.0021699	0.00176081	0.0226142	0.0118043	0.0209967	0.00266036	0	0.000776906	0.00509075	0.105981	0.0176907	0.0863914	0.00531232	0.00351852	0.00220924	0.00595853	0.0062413	0.00344862	0.00960125	0.0197026	0.00988091	0.0224049	2.90062e-05	0.0899228
A[C>T]C	0.00632112	0.00138004	0.012405	0.00417965	0.0178964	0.0229126	0.0177115	0.03809	0.00768065	0.00139979	0.00281989	0.00541955	0.000834065	0.00524993	0.147209	0.00212028	2.2199e-16	0.0101044	0.00691148	0.00372884	0.00171022	7.02952e-05	0.00465306	0.0140931	0.013006	0.00391982	0.000220101	0.0809507	0.0112041	0.013098	0.00254034	0	0.00337959	0.00431063	0.090384	0.00927512	0.122988	0.00213093	0.00370844	0.00398862	0.00327919	0.00306064	0.00214914	0.00404053	0.0121016	0.00336031	0.0398087	0.000128027	0.0169043
A[C>T]G	0.365065	3.27009e-05	0.00257103	0.000782935	0.00617876	0.120066	2.23145e-16	0.000542857	0.000927078	0.00120981	0.00322987	0.00437964	0.00557043	0.000413994	0.0075908	0.000118015	0.000302987	0.0265116	0.074516	0.00326899	3.9505e-05	0.00028698	0.012208	0.00154925	0.0133061	0.00739965	0.00136063	0.00872546	0.000514189	0.0196969	0.00533072	0	0.00704915	0.0201029	0.0143974	0.00758601	0.0365963	0.00716313	0.00011795	0.0005798	0.00706825	0.00633132	0.00517792	0.00600078	0.000267036	0.00343031	0.000440096	0.00122026	0.0143036
A[C>T]T	0.0095817	0.00186005	0.0121048	0.00424965	0.0219956	0.0213117	0.00742482	0.0107972	0.00748063	0.032895	0.0124995	0.00648946	0.00299023	0.00792989	0.109155	0.00238031	0.000317986	0.0161071	0.00178038	0.00599814	0.000737093	0.00014699	0.00797524	0.0367821	0.013006	4.1698e-05	0.000616283	0.0350219	0.00915337	0.00572911	0.00279038	0	0.00505939	0.00183027	0.0292948	0.0100947	0.151985	0.00307134	0.00386837	0.000899689	0.00430894	0.00565118	0.00243902	0.0128017	0.0169022	0.00635058	0.0352077	0.000910194	0.0303077
A[T>A]A	0.000800142	9.59028e-05	0.0054922	0.00941922	0.00737852	9.82538e-05	0.00194126	0.00248934	0.012401	8.88864e-05	0.0194992	0.0126989	5.07039e-05	0.00181997	0.000417594	0.00517068	2.2199e-16	0.000613269	0.00204044	0.0230928	0.00101013	6.25957e-05	0.00249164	0.000785618	0.000511234	0.00345984	0.0639294	8.28518e-18	0.00158058	0.0203968	0.00152021	0	0.000171979	0.000619091	0.000362936	0.00785587	0.000712929	0.000868379	0.102957	0.00488831	0.0024394	0.00225047	0.0019892	0.00531069	0.00610081	0.00746068	0.0133029	0.0153033	0.00478121
A[T>A]C	0.0022304	0.000878025	0.00721289	0.00352971	0.00692861	0.000546299	0.000670435	0.000466877	0.00342029	0.00107983	0.0212991	0.00281977	0.000194015	0.000336995	0.000441628	0.00271036	6.51971e-05	0.000372163	0.00084118	0.0077376	0.000997126	0.00028898	0.000878577	0.000254876	0.00519238	0.00564973	0.00701322	5.56348e-18	0.00225083	0.00888862	0.00352048	0	0.000477942	0.00200029	0.00039293	0.00606681	0.000886911	0.0011405	0.0443813	0.00735746	0.00142965	0.00166035	0.00193922	0.00288037	0.00444059	0.00430039	0.00401087	0.00378081	0.00260066
A[T>A]G	0.0011402	2.55007e-05	0.00964386	0.012399	0.00911818	2.22122e-16	0.000587381	0.00155959	0.000211018	0.00369943	0.0227991	0.00275977	2.23017e-16	2.33997e-05	3.9356e-05	0.00312041	0.000589974	0.000354155	0.000540116	0.00880727	0.000200025	6.56955e-05	0.00260171	0.000951537	0.000303139	0.000247988	0.0606279	0.000354222	0.00200074	0.00623903	0.000625084	0	0.000151982	0.00248036	0.000637887	0.00502736	0.000711929	0.000696304	0.0345854	0.00132954	0.00252938	0.00249052	0.00107957	0.0069409	0.00693092	0.00303028	0.00501109	0.00143031	1.08027e-06
A[T>A]T	0.000183032	2.23006e-16	0.00611244	0.00420965	0.00619876	0.00166091	0.00371241	0.00828782	0.0507043	0.0410937	0.024999	0.0188984	0.00666052	0.00284996	3.40484e-06	0.00282037	0.000605973	0.00185081	0.00954204	0.0109966	0.00146018	0.000632957	0.00784515	0.000653682	0.0256117	0.00159992	0.00251115	0.000161101	0.00180066	0.0148977	0.00307041	0	0.00169979	0.00196029	0.000489913	0.00415781	0.000843916	0.00507222	0.315867	0.00736745	0.00306924	0.00277058	0.00271891	0.0061208	0.0107014	0.0696064	0.00685149	0.00428091	0.0308078
A[T>C]A	0.00109019	6.17018e-05	0.0165066	0.00794934	0.0461908	0.00221121	0.000490318	0.00101973	0.000288024	0.00435933	0.00976961	0.0202983	0.000745058	0.00934987	0.00114162	0.0736096	0.00190992	0.0126055	0.00389083	0.241925	9.65122e-05	9.72933e-05	0.00202133	0.00258874	0.0107049	0.0166992	0.0250115	0.000886555	0.00640236	0.0206968	0.0848115	0	0.000548934	0.00196029	0.000610892	0.0203893	0.000935907	0.0125055	0.00461806	0.0020393	0.0052487	0.0733152	0.00278888	0.0112015	0.0187025	0.0144013	0.0116025	8.88189e-06	0.0193049
A[T>C]C	0.00304054	2.15006e-05	0.00776311	0.000714941	0.0133973	0.00113062	0.000227147	0.00045588	0.000533045	0.0039294	0.0050098	0.0104991	0.00362028	0.000509993	0.000939336	0.0403053	0.000141994	0.00630277	0.00196042	0.012896	0.0127016	0.000251983	0.00209137	0.000593711	0.00455208	0.00999953	0.000899413	0.000178111	0.0021808	0.00949853	0.0261035	0	0.000440947	0.00229034	0.000457919	0.00739611	0.00070093	0.00375164	0.00122948	0.000820716	0.00168958	0.038408	0.00163934	0.00564073	0.00734098	0.00579053	0.00351076	0.0313067	0.00324082
A[T>C]G	0.000106019	1.32004e-05	0.0123049	0.00499959	0.0381924	0.00424232	0.000187121	0.0014996	0.00107009	0.00918859	0.00697972	0.0142988	0.00214017	0.000530993	0.000320456	0.0705092	0.000427981	0.0124054	0.000240051	0.0638802	0.000376047	2.22985e-16	0.00208137	0.00230888	0.0186085	0.00387982	0.00775356	0.000470294	0.00176065	0.0198969	0.0785106	0	0.000404951	0.0027504	0.000276951	0.00811573	0.00108989	0.0734321	1.94918e-05	0.000919682	0.00383905	0.0168035	0.00216913	0.00964125	0.0155021	0.00804074	0.00856186	0.000586125	0.0272069
A[T>C]T	0.00574102	0.000155004	0.0173069	0.00155987	0.0382923	0.000502275	0.000615399	0.00214943	0.00265022	0.0509922	0.0148994	0.0289976	0.00336026	0.000149998	0.00119169	0.0638084	0.000958958	0.00597262	0.000929199	0.135958	0.00779098	0.000543963	0.00424279	0.00173915	0.000103047	0.0255988	0.000755347	0.000261163	0.0024409	0.0144978	0.037205	0	0.000594928	0.00115017	0.000544903	0.00846555	0.000609939	0.00921403	0.00233902	0.0020293	0.00511874	0.04801	0.0034886	0.0136018	0.0194026	0.0177016	0.00270059	0.00880188	0.000267068
A[T>G]A	0.000172031	0.000238007	0.00395158	0.00104991	0.00385923	2.57141e-05	0.000473307	8.43778e-05	0.011901	0.00369943	0.00163993	0.0450963	0.00192015	3.46995e-05	0.00021831	0.00201026	6.13973e-05	0.000212093	0.0004681	0.0111965	0.000851107	0.0014099	0.000721474	0.00232887	1.05048e-05	0.000391982	0.00233107	8.28518e-18	0.00321118	0.00527918	0.00292039	0	0.00986881	0.00040706	3.89931e-05	0.00367807	0.000385961	0.000979428	0.00281881	0.00304895	0.00108973	0.0217045	0.00114954	0.0038805	0.00723096	0.00753069	0.00120026	0.00263056	2.40061e-08
A[T>G]C	0.000207037	7.46022e-05	0.00260104	0.000158987	0.00259948	0.000204112	0.00024716	0.000931754	0.00105009	0.00265959	0.000667973	0.00692942	0.0012401	5.32993e-05	4.67665e-05	0.000664087	2.2199e-16	0.0029713	0.000415089	0.00440863	0.000700088	0.00447969	0.000858564	0.00188908	2.13098e-05	0.000436979	5.09234e-05	5.4334e-18	0.00140052	1e-18	0.00253034	0	0.0172979	0.00081712	0.00010998	0.0024787	0.000428957	0.000302132	0.000461806	0.000965666	0.000622846	0.0106022	0.00106957	0.00297039	0.00705094	0.00164015	0.000405088	0.00407087	3.26083e-05
A[T>G]G	0.000268048	2.05006e-06	0.00630252	0.00141988	0.00793841	0.000107059	0.000276179	0.00146961	0.000604051	0.0105984	0.00476981	0.00532956	0.000320025	0.000522993	0.000179255	0.000808106	8.24964e-05	0.000709311	0.00018504	0.00461857	0.000719091	0.000989932	0.00199131	0.00176914	2.69123e-05	0.000186991	0.00295136	5.68356e-18	0.00206076	0.00713889	0.00229031	0	0.00767907	0.000420062	0.000409927	0.00401789	0.00126987	0.000475208	0.000196917	0.00447845	0.000935769	0.0168035	0.00206917	0.007661	0.00806107	0.00270025	0.000637139	0.0349074	7.47189e-06
A[T>G]T	0.00011202	3.76011e-06	0.00397159	0.000215982	0.00482903	0.000386212	0.000309201	0.000732807	2.22019e-16	0.0142978	0.00073997	0.023898	0.00922072	2.21997e-16	0.000285406	0.00128017	0.000319986	0.0111049	0.00363078	0.00795753	0.0125016	0.0690953	0.00184121	0.00161921	5.82266e-05	6.94967e-05	4.18192e-05	7.43465e-18	0.00471173	1e-18	0.0059308	0	0.114986	0.000810119	0.000793859	0.000782588	6.44936e-18	0.000758331	0.00114952	0.00262909	0.000983757	0.0247051	0.00285885	0.00642083	0.0180024	0.0076107	0.000911198	0.0056412	0.00142036
C[C>A]A	0.000312055	0.000208006	0.022509	0.0806933	0.00742851	0.001821	0.000455295	0.0011397	0.000109009	0.0144978	0.0400984	0.0047996	0.00318025	0.000520993	0.00061888	0.00542071	0.00139994	0.0163072	0.041809	0.0103968	0.000295037	0.000270981	0.0740486	0.00131936	0.0376172	2.2199e-16	0.00183084	0.000151095	0.0254094	0.0147977	0.00141019	0	0.00202975	0.0542079	0.000767864	0.0106944	0.00123988	0.00270118	0.00194918	0.0298897	0.0557862	0.00322067	0.380847	0.0101013	0.0208028	0.00238022	0.0116025	0.00663141	2.84072e-05
C[C>A]C	0.00179032	9.53028e-05	0.0253101	0.0796934	0.00613877	0.00409224	0.000240156	0.00154959	0.00309026	0.00321951	0.0387984	0.00191984	0.000202016	0.00317996	0.000987404	0.00428056	0.000967957	0.0197086	0.00505108	0.0090272	0.00116015	4.10972e-05	0.0196129	0.000766627	0.0989453	0.00259988	0.00443204	0.000630395	0.0349128	0.00781879	0.0015102	0	0.000108987	0.0369054	0.000387931	0.0115939	0.00491951	0.00191084	3.66846e-05	0.0329886	0.020195	0.000814169	0.0694721	0.00906118	0.014702	0.000919084	0.0328071	8.20175e-05	0.0303077
C[C>A]G	9.32165e-05	2.23006e-16	0.002511	0.024498	0.00345931	0.0016509	2.23145e-16	0.000407893	0.00191016	8.50869e-05	0.00340986	0.00136989	4.64036e-05	8.37988e-05	9.2131e-06	0.00117015	4.32981e-06	0.00138061	6.62142e-05	0.00173946	2.22028e-16	2.22985e-16	0.0120079	0.000235885	0.0074334	0.00197991	0.000136063	0.000130081	0.0160059	0.0012798	0.000362049	0	2.21973e-16	0.0148022	0.000406928	0.000328827	1.65983e-05	0.000371162	0.000297875	0.00219924	0.00709825	0.000747155	0.0509796	0.00574075	0.00254034	0.000261024	0.00188041	2.56055e-05	0.00374095
C[C>A]T	2.2304e-16	0.000421012	0.0154062	0.0689943	0.0064887	0.00960526	0.000372242	0.00148961	0.0135011	0.000116982	0.0329987	0.00305975	0.0173013	0.00832988	0.000150214	0.00110014	2.2199e-16	0.260114	0.0287061	0.00248923	0.000137017	0.000181988	0.0363239	3.43833e-05	0.252115	0.0190991	0.000110051	0.000580363	0.0171063	0.012598	0.00714096	0	0.000202975	0.0519076	0.000296947	0.0278853	0.00266973	0.00253111	0.000619739	0.0824715	0.0604851	0.00177037	0.183926	0.00603078	0.014702	0.00265024	0.0211046	5.22111e-18	0.086722
C[C>G]A	2.41043e-05	2.23006e-16	0.0193077	0.00782935	0.00695861	4.11225e-05	2.23145e-16	0.000457879	0.000206017	0.0013198	0.0049998	0.000892926	4.57035e-05	2.98996e-05	0.000261372	0.00134018	0.00560975	8.55375e-05	8.36179e-05	0.0035489	0.00055307	0.000193987	0.000613403	0.00176914	7.69352e-05	1.96991e-05	0.00105048	0.000174109	0.00261096	0.00719888	0.000364049	0	1.43983e-05	0.00329048	0.00126977	0.00204892	0.00114989	0.00150066	0.00011895	0.00385867	0.00123969	0.000442092	0.00168932	0.0288037	0.00756101	0.00208019	0.00426093	2.09045e-05	5.36136e-05
C[C>G]C	7.68136e-05	0.00035101	0.0141056	0.00686943	0.00906819	3.72204e-05	0.000131085	0.000959747	0.00226019	0.000285956	0.00545978	0.00153987	2.23017e-16	2.21997e-16	0.000177252	0.000891117	0.000647971	7.86345e-05	1.70036e-05	0.00453859	0.00023503	4.65968e-05	0.00226149	0.00180912	4.38201e-06	0.000272987	0.000785361	0.00025516	0.00522192	0.00459929	0.000322044	0	7.54909e-05	0.00634093	0.000792859	0.00185902	0.000823918	0.000410179	0.00011795	0.00629782	0.00136966	0.000313065	0.00125949	0.0377049	0.00935124	0.00120011	0.00662144	0.000212045	2.49063e-05
C[C>G]G	0.000352062	4.87014e-05	0.0015006	0.00339972	0.0024895	8.43462e-05	7.75503e-05	0.000790792	0.000262022	0.0013198	1.04996e-05	0.000436964	2.01016e-05	2.21997e-16	1.1216e-05	0.000173023	0.000487979	1.91084e-05	5.02108e-05	0.00145955	0.000232029	2.22985e-16	0.00358235	4.80766e-05	0.000188086	1.00995e-05	0.00023911	1.86116e-18	0.000945348	0.000823872	4.17056e-05	0	2.21973e-16	0.00130019	0.000119979	0.000853551	0.000536946	0.000318139	0.00018992	0.000869699	0.000418897	0.000321067	0.000956616	0.0123016	0.00168022	0.000411038	0.000470102	0.00254054	7.68195e-18
C[C>G]T	2.2304e-16	6.36018e-05	0.0223089	0.00681943	0.00952809	1.44079e-05	9.56621e-05	0.000889766	0.00424036	2.21966e-16	0.00548978	0.00302975	3.01023e-05	2.21997e-16	9.65373e-06	0.0015602	0.00639972	0.000178078	8.45181e-05	0.00961702	3.90049e-05	0.000192987	0.00379249	0.00321843	1.01046e-05	0.000172992	0.000320147	0.000227142	0.00471173	0.00019597	0.000625084	0	2.21973e-16	0.00669098	0.00101982	0.0034182	0.000494951	0.000662289	7.3569e-05	0.0161944	0.00208948	0.000581121	0.00126949	0.0402052	0.0139018	0.00503046	0.00684149	0.000853182	8.64219e-05
C[C>T]A	0.00200035	0.00432012	0.0161064	0.0126989	0.0193961	0.0136075	0.0500325	0.106972	0.00271023	0.0355945	0.00266989	0.0072394	3.68029e-05	0.000150998	0.0040758	0.00659086	1.92992e-05	0.0027312	0.0108023	0.00716778	0.000821104	0.000456969	0.0117077	0.118942	0.0106049	0.00134994	0.00121056	0.0622389	0.00538198	0.0142978	0.00169023	0	0.000291965	0.00761112	0.10998	0.0411783	0.0168983	0.00459201	0.004748	0.00509824	0.00674833	0.00361075	0.0042383	0.00911118	0.0196026	0.00691063	0.0187041	7.62163e-06	0.0035709
C[C>T]C	0.000270048	0.000170005	0.0202081	0.011499	0.0189962	0.0148081	0.0553359	0.181952	0.0059705	0.0025996	0.00401984	0.00875927	2.23017e-16	8.43988e-05	0.126179	0.000254033	0.00134994	0.00138061	0.0111024	0.00283912	0.00172022	5.8896e-05	0.00676444	0.0919552	0.013006	0.00515976	0.00319147	0.189118	0.00885326	0.00593908	0.00283038	0	0.000209975	0.00164024	0.102982	0.163914	0.0283972	0.00153067	0.000513784	0.0831712	0.00667835	0.00210044	0.0047281	0.0038605	0.0173023	0.00185017	0.0481105	4.35093e-18	0.00286072
C[C>T]G	0.196035	0.00277008	0.0022409	0.00330973	0.0174965	0.122067	0.00671436	0.0220942	0.00894075	0.00263959	0.00148994	0.00650946	2.23017e-16	0.00369995	0.00092131	4.09054e-05	0.00198991	0.0116051	0.0248053	0.000690786	0.00190024	0.000542963	0.016811	0.0156924	0.0165076	0.00621971	0.000426196	0.0142089	0.00635234	0.0115982	0.00334045	0	0.00254969	0.0153022	0.016797	0.00819569	0.0111989	0.00588257	0.00944602	0.00266908	0.00532868	0.00327068	0.0034986	0.00757098	0.00236031	0.0101009	0.00192042	9.72207e-05	0.0155039
C[C>T]T	0.000196035	0.00145004	0.0230092	0.0159987	0.0230954	0.0138076	0.0566368	0.125967	0.0206017	0.000137979	0.0144994	0.0110991	0.000103008	0.000594992	0.0651927	0.00338044	0.00144994	0.0013606	0.0156033	0.019294	0.00174022	0.000135991	0.00665437	0.257874	0.0117054	0.000324985	0.00160074	0.156098	0.00429158	0.0135979	0.00165022	0	0.0033196	0.000673099	0.0461918	0.144924	0.0427957	0.00270118	3.52851e-05	0.0469838	0.00574858	0.00606126	0.00409836	0.00699091	0.0216029	0.00773071	0.0329072	0.000744159	0.00504128
C[T>A]A	4.30076e-05	0.000243007	0.00794318	0.0143988	0.00353929	6.66365e-05	0.000177115	0.0011197	0.00347029	0.00160975	0.0189992	0.0047896	2.23017e-16	7.0899e-05	0.000184262	0.000546072	0.000208991	0.000155068	0.000348075	0.003209	0.000434055	9.35936e-05	0.000542356	9.59533e-05	0.000144066	6.18971e-06	0.128059	0.000462289	0.00132049	0.0262959	0.000944128	0	0.000139983	0.00195029	0.000213962	0.0205892	0.000324968	0.000746326	0.02369	0.0525818	0.00125969	0.00157033	0.00089664	0.00494064	0.00109014	0.00362033	0.0126027	0.00136029	1.24031e-05
C[T>A]C	0.00039307	0.000244007	0.0178071	0.012199	0.00518896	0.000551302	0.000261169	0.000957748	0.0134011	8.12875e-05	0.0291988	0.00312974	2.23017e-16	0.000105999	0.000212302	0.00560073	0.000341985	0.00295129	0.000244052	0.00569823	0.0405051	0.00223985	0.00306201	0.000402804	0.00648297	0.000687968	0.0551253	4.4728e-18	0.00187069	0.0157976	0.0014502	0	0.00134984	0.00141021	0.000776862	0.0210889	0.000649935	0.000992434	0.000408828	0.0329886	0.00145964	0.00116024	0.00201919	0.00644084	0.00762101	0.00319029	0.00172037	1.21026e-05	0.00325082
C[T>A]G	0.000324057	0.000149004	0.0132053	0.0324973	0.005009	0.000115063	0.000112073	0.000882767	0.000961081	0.00119982	0.0275989	0.00530956	2.23017e-16	2.21997e-16	0.000305434	0.00141018	0.00022599	0.000317139	8.20176e-05	0.00102968	0.0124016	0.000716951	0.00321211	0.000293857	0.000123056	0.000124994	0.168077	0.000132083	0.00503185	0.0628903	0.00114015	0	0.000805902	0.00198029	0.000586896	0.0186902	0.00140986	0.000479209	0.00116951	0.0581799	0.00213947	0.00160033	0.00177929	0.00680088	0.00346046	0.00312029	0.0149032	0.000296063	0.000582147
C[T>A]T	0.000260046	2.23006e-16	0.0127051	0.011799	0.00429914	0.000179098	0.000371241	0.00011197	0.0487041	0.00114982	0.0417983	0.00443963	0.000376029	0.000233997	0.000162231	0.0015002	0.000522977	0.00138061	0.00105022	0.00652797	0.0723091	0.00778947	0.00226149	0.000217894	0.000102047	2.2199e-16	0.0603277	0.000375235	0.00480177	0.0365943	0.000642087	0	0.00102988	0.00198029	0.000611891	0.0309837	0.000662934	0.00112049	0.000267887	0.0663771	0.00195952	0.00206043	0.00235905	0.00827108	0.00928123	0.00901083	0.00757165	0.000203043	1.38035e-05
C[T>C]A	2.2304e-16	0.000302009	0.00883353	0.00517957	0.0132973	0.00166091	0.000451293	0.0015296	0.00757064	0.0101984	0.0023899	0.0136989	0.000122009	0.00131998	0.000328467	0.0454059	4.73979e-05	0.00316139	0.000750161	0.0106967	0.0111014	0.000646956	0.000386254	0.00045178	0.0117054	0.0114995	0.0067431	6.8643e-18	0.00227084	0.0090286	0.052007	0	0.00131984	0.00118017	0.00126977	0.00814572	0.000592941	0.0151066	0.00059375	0.00132954	0.00149963	0.0500104	0.00194922	0.00734095	0.0109014	0.0103009	0.00354077	0.00272058	0.0146037
C[T>C]C	0.00250044	2.85008e-05	0.0145058	0.0023598	0.0103979	0.00103056	0.000259168	0.000839779	0.0035803	8.88864e-05	0.00699972	0.0152987	4.12032e-05	0.000123998	0.000714015	0.0497065	0.000121995	0.00534234	0.00215046	0.00316902	0.173022	0.00645956	0.00246162	8.13604e-05	0.00483221	0.00281987	0.00134062	4.4728e-18	0.00224082	0.0107983	0.0312042	0	0.00261968	0.00184027	0.00137976	0.00990479	0.000926907	0.0301132	4.0383e-05	0.0020193	0.00187954	0.0218045	0.00231907	0.00791103	0.00987131	0.00525048	0.00313068	0.105022	0.00320081
C[T>C]G	0.000360064	2.23006e-16	0.010104	0.00549954	0.0207958	0.00532292	0.000104068	0.000729808	0.00217018	0.000934856	0.00125995	0.0153987	0.00105008	2.52996e-05	0.000131187	0.0374049	2.2199e-16	0.00447196	0.0013903	0.00960702	0.087311	0.00391973	0.00162107	0.000497758	0.0261119	0.0143993	0.00203093	0.000389244	0.00422155	0.0133979	0.0787106	0	0.0024897	0.00391057	0.00126977	0.00445766	0.00183982	0.0400175	0.000810659	0.00155946	0.00184954	0.00995207	0.00253898	0.00777101	0.0105014	0.00557051	0.00356077	0.00925197	0.0338086
C[T>C]T	4.26076e-05	0.000186005	0.0158063	0.00255979	0.014897	0.0012707	0.00182118	0.00572849	0.0431036	0.0396939	0.00645974	0.0328973	2.44019e-06	0.000814989	8.46203e-05	0.045906	0.000111995	0.0020609	0.00175037	0.0154952	0.426054	0.0182987	0.00256168	0.00039081	0.00690316	0.021699	0.000536246	4.71295e-05	0.00363134	0.00895861	0.0555075	0	0.000366956	0.00178026	0.00409927	0.0137927	0.00108989	0.00307134	0.00158933	0.0031789	0.00215947	0.0504105	0.00426829	0.00859112	0.0136018	0.00787072	0.0032407	0.00945202	0.00771195
C[T>G]A	3.55063e-05	0.000153004	0.00437175	0.000869928	0.00258948	4.95271e-05	8.42547e-05	0.000358905	0.00328028	0.00147977	0.00121995	0.0259978	0.000155012	0.000226997	2.22316e-16	0.000893117	4.13982e-05	4.85213e-05	0.000206044	0.00395877	0.000310039	0.00204986	0.000111073	0.000713653	0.000963441	4.3498e-06	0.00491226	6.85429e-18	0.00143053	1e-18	0.00142019	0	0.0145982	0.000781114	0.000197965	0.00196896	5.80942e-05	0.000728318	0.00105955	0.00370872	0.000477882	0.00260054	0.000982606	0.00530069	0.00335045	0.00347032	0.000870189	0.00273058	0.000234059
C[T>G]C	0.000212038	0.000155004	0.00704282	0.000440963	0.00460908	0.00078443	0.000172112	0.000791791	0.00558047	4.97924e-05	0.00194992	0.00740939	2.23017e-16	0.00114998	2.22316e-16	0.00114015	2.81988e-06	0.00121053	0.000157034	0.00107966	0.00104013	0.0313978	0.00199131	0.00208898	0.00160073	5.43974e-05	0.000880405	0.000148093	0.000880324	0.00288955	0.00494067	0	0.0220973	5.69083e-06	0.000214962	0.00142925	0.000449955	0.000949415	2.21907e-16	0.000517821	0.00056586	0.0023805	0.00140943	0.00739096	0.00567075	0.00241022	0.000753164	0.00726155	0.00253064
C[T>G]G	0.000128023	0.000121003	0.0107043	0.00378969	0.00612877	0.000924507	2.23145e-16	0.00128966	0.0011901	2.5796e-05	0.00469981	0.0141988	5.35042e-05	0.000478993	2.22316e-16	0.000593078	2.2199e-16	0.000435191	0.000272058	0.00223931	1.94024e-06	0.0136991	0.00293193	0.00132935	0.00271124	2.00991e-05	0.00803369	6.52408e-05	0.00304112	0.0117982	0.00556075	0	0.0154981	0.000332049	7.84861e-05	0.00149921	0.00108989	0.00107047	0.000435816	0.0063578	0.000886781	0.00377078	0.00158936	0.00983128	0.00559074	0.00304028	0.00568124	0.0465099	0.00347088
C[T>G]T	0.00017103	0.000203006	0.00703281	0.0011999	0.00729854	0.00130071	2.65172e-05	3.67903e-06	0.00340029	0.000155976	0.000573977	0.0564953	0.0013001	0.00522993	0.000133189	0.000344045	5.54976e-05	0.000962422	0.00249053	0.00253921	0.00531067	0.549962	0.00414272	0.00219893	0.00511234	0.000184991	0.00119055	0.000247155	0.00471173	0.00854867	0.00780105	0	0.100988	0.000767112	0.000264953	0.000948501	0.000675932	0.000192084	6.54724e-07	0.00270906	0.00106974	0.00411086	0.00687724	0.00494064	0.0131017	0.010501	0.00348076	6.26134e-18	0.000384097
G[C>A]A	0.00158028	8.62025e-05	0.00713285	0.0315974	0.010198	0.000427234	4.06264e-05	0.000745803	0.00105009	0.000167974	0.024199	0.00771936	0.00121009	0.00073099	0.000165235	0.00198026	0.000948958	0.00208091	0.00229049	0.00860733	0.00178022	0.000997932	0.109072	0.000813604	0.0108049	0.0021399	0.00223103	0.000337211	0.0622229	0.0134979	0.000496067	0	0.000155981	0.0971142	0.000942833	0.0130931	0.00450955	0.00441193	0.00280882	0.00986659	0.0676833	0.00204042	0.0119952	0.00688089	0.0142019	0.00309028	0.00771168	0.00930198	7.68195e-18
G[C>A]C	0.00033906	2.23006e-16	0.0109044	0.0347971	0.00764847	0.000913501	0.00013809	0.000214943	0.000742062	2.21966e-16	0.0261989	0.00667945	0.000441034	0.00254996	0.000405577	0.000417055	0.00045098	0.0224098	0.00249053	0.00424868	0.00128016	2.77981e-06	0.0173114	0.000271868	0.00565259	0.00706967	0.0017308	0.000541339	0.128047	0.006469	0.00066609	0	0.00101988	0.0903132	0.000493912	0.0214887	0.00361964	0.000968423	0.000467803	0.0501827	0.0191953	0.000629131	0.00627748	0.0069509	0.0102014	0.000723066	0.0268058	0.00169036	0.00467118
G[C>A]G	0.000587104	1.39004e-05	0.00143057	0.0152987	0.00233953	0.000357196	4.25276e-05	7.28808e-05	2.22019e-16	1.81972e-05	0.00273989	0.000170986	1.05008e-05	8.51988e-05	1.39198e-05	0.000447059	0.000163993	0.00111049	0.000404087	0.00135958	0.000106013	9.23937e-05	0.00756497	0.0002049	0.00157072	0.00168992	0.000515237	0.000119075	0.0659243	0.000657898	0.000129017	0	3.94952e-05	0.0230034	2.21961e-16	0.000971489	0.000876912	0.00034215	0.000226904	0.000506825	0.00482881	0.000506105	0.00136945	0.00453059	0.00255034	0.00022002	0.00106023	0.000177038	0.000605153
G[C>A]T	2.2304e-16	5.12015e-05	0.010004	0.0211982	0.00681864	0.00123067	2.23145e-16	0.000146961	0.000363031	7.39886e-05	0.0268989	0.00855929	0.0111009	0.00279996	2.22316e-16	2.75036e-05	6.14973e-05	0.126055	0.0182039	0.0057982	4.70059e-05	0.000533963	0.062341	0.000272867	0.00249114	0.00889958	0.000551253	3.09193e-05	0.05442	0.0104984	0.00081711	0	0.000157981	0.0846124	0.000861847	0.00350815	0.00326967	0.00319139	1.34943e-05	0.0228921	0.068983	0.00129027	0.00908636	0.00589077	0.0108014	0.00195018	0.0181039	0.0013903	0.0113029
G[C>G]A	9.5917e-06	6.54019e-05	0.0127051	0.00528956	0.00467906	1.94106e-05	1.96127e-05	5.10865e-05	0.000182015	0.00019597	0.0025799	0.00135989	1.50012e-05	1.71998e-05	4.67665e-05	0.000564074	0.00149993	2.22097e-16	0.000994213	0.00104967	0.000878111	5.98959e-05	0.000635417	0.00130936	0.000669306	0.000387982	0.00140064	4.32271e-18	0.002721	0.00416935	0.000395053	0	0.000182978	0.00227033	0.000514909	0.00182904	0.000875912	0.000771337	3.33859e-05	0.00337883	0.000885781	0.00132027	0.00119952	0.0240031	0.00506067	0.00204019	0.00240052	0.0136029	0.000219055
G[C>G]C	0.000164029	0.000261008	0.00863345	0.00574952	0.00507898	0.000685376	3.32216e-05	0.000451881	0.00047304	2.21966e-16	0.0023899	0.00282977	8.31065e-05	0.000135998	0.000114162	0.000289038	0.000478979	4.3319e-05	0.00060813	0.00308904	0.000835105	5.54962e-05	0.00134088	0.00128937	0.00286131	0.00141993	0.000930428	0.00012708	0.00579213	0.00238963	0.000579078	0	2.21973e-16	0.00164024	0.000255955	0.00750605	0.00089991	0.000776339	0.000192919	0.0213926	0.00107973	0.000938195	0.00107957	0.0213028	0.00537071	0.00269025	0.00142031	0.0152032	0.0011903
G[C>G]G	0.000166029	2.23006e-16	0.00242097	0.00329973	0.0015097	2.22122e-16	4.51293e-05	0.000336911	0.000180015	0.000544916	0.00048798	0.000520957	2.23017e-16	2.21997e-16	3.24461e-06	9.54125e-05	0.000240989	2.22097e-16	1.01022e-05	8.12748e-05	2.3703e-05	2.22985e-16	0.00063942	0.00059671	0.000692317	0.000116995	0.000211097	1.83115e-18	0.00314116	0.000417935	7.381e-05	0	2.21973e-16	6.88101e-06	0.000116979	0.00045676	6.85931e-05	4.66204e-05	2.21907e-16	0.000590796	0.000171958	0.00057712	0.00101959	0.00986128	0.00119016	0.000156014	0.000223048	0.0128027	7.68195e-18
G[C>G]T	2.2304e-16	0.000134004	0.0147059	0.00303975	0.00671866	0.000321176	4.20273e-05	0.000276927	0.00128011	0.000881865	0.0048598	0.00856929	3.54027e-05	0.000112998	0.000186265	0.000504066	0.00269988	8.03352e-05	0.000451097	0.003229	0.000787099	2.22985e-16	0.00123081	0.000319844	0.00302138	0.00020699	0.000455209	4.04253e-18	0.00338124	0.00198969	0.000305041	0	2.21973e-16	0.00321047	0.000398929	0.00335823	0.000227977	0.000931407	2.68887e-05	0.00873698	0.00104974	0.00127026	0.000916632	0.0324042	0.00698093	0.00356033	0.0027706	0.0180038	0.00185047
G[C>T]A	0.00444079	2.23006e-16	0.0164066	0.00408966	0.0193961	0.0936513	8.49551e-05	0.000854775	0.000157013	0.000364944	0.000275989	0.00697942	4.22033e-05	0.000362995	0.0197281	0.00448059	0.00717968	0.0171075	0.0737158	0.00649798	0.00164021	6.10958e-05	0.00968636	0.0609703	0.0422193	0.00931956	0.00238109	0.0537336	0.029911	0.00999845	0.00275037	0	0.00324961	0.0104015	0.0496912	0.00679643	0.0225977	0.00535234	0.000232902	0.00728748	0.00371908	0.00255053	0.00236905	0.00803104	0.0143019	0.00601055	0.0336073	0.000766163	0.0955242
G[C>T]C	9.28165e-05	1.29004e-07	0.0134054	0.00445963	0.0215957	0.111061	0.0117076	0.0262931	9.5108e-06	0.000180972	0.00024499	0.00652946	0.012501	0.0150998	0.115164	0.00182024	0.000920959	0.00816358	0.129028	0.00528836	2.22028e-16	0.000156989	0.00817537	0.0396807	0.0532244	0.0195991	0.00187086	0.154096	0.0437161	0.00694892	0.00545074	0	0.000187977	0.00796117	0.0609892	0.011394	0.0378962	0.00514225	2.21907e-16	0.0177938	0.00339916	0.00231048	0.00295881	0.00450059	0.0116015	0.00864079	0.152033	4.10087e-18	0.0814206
G[C>T]G	0.218039	2.23006e-16	0.000528211	0.00048196	0.0122975	0.178098	5.52358e-06	0.000175954	3.43029e-05	0.000156976	0.00190992	0.0047596	0.0149012	0.0125998	0.00178254	7.46098e-05	0.000177992	1.92084e-05	0.277059	0.00116964	0.0016102	0.000854941	0.0148097	0.00320844	0.0205094	4.3398e-05	2.22102e-16	0.0123077	0.0254094	0.0104984	0.0066809	0	0.000214974	0.0183027	0.00523907	0.00196896	0.010399	0.00584255	0.016693	0.00252913	0.00569859	0.0043209	0.0044782	0.00548071	3.93052e-18	0.0171016	0.00455099	9.66206e-06	0.0496126
G[C>T]T	3.84068e-05	5.04015e-05	0.0113045	0.00380968	0.0185963	0.0744408	0.0161105	0.00538858	0.000758064	0.0420935	0.00460981	0.0106991	0.013501	0.0318996	0.0696991	0.00267035	0.00126994	0.0105046	0.0772165	0.00671792	6.60083e-05	2.22985e-16	0.0066944	0.108947	0.0331152	0.00804962	0.00176081	0.107067	0.0203075	0.00981848	0.00498067	0	0.000101988	0.00512075	0.0176969	0.005697	0.0531947	0.00393172	0.000516782	0.00602792	0.0036291	0.00232048	0.00319872	0.00861112	0.0127017	0.00841077	0.0865188	0.0018604	0.0666169
G[T>A]A	8.12144e-05	2.23006e-16	0.00706283	0.00921923	0.00366927	5.1028e-05	0.00040126	0.000525861	0.00173015	2.36964e-05	0.0127995	0.00264978	3.31026e-06	2.21997e-16	1.54219e-06	0.000826108	6.6997e-06	5.77253e-05	0.000511109	0.000939708	6.46082e-05	9.72933e-05	0.00160105	0.000188908	5.56255e-05	0.00116995	0.0537247	6.26392e-18	0.00157058	0.0361944	0.000783106	0	0.000115986	0.0034305	0.000328942	0.001899	0.00878912	0.000810354	0.018992	0.000716752	0.000879783	0.00115024	0.000892642	0.00496064	0.00265035	0.00233021	0.0120026	0.00618132	0.00116029
G[T>A]C	0.000129023	0.000131004	0.00748299	0.0035997	0.00290942	0.000489268	0.000224145	0.000255933	0.00227019	0.000111983	0.0134995	0.00211982	2.23017e-16	0.000122998	0.000375534	0.00181024	0.000129994	0.0027312	0.000589126	0.000607811	0.00340043	0.000346976	0.00195128	7.77622e-05	0.00256117	0.00325985	0.0102047	0.000140088	0.00235087	0.00584909	0.00115016	0	0.000117986	0.000789116	0.000181968	0.00290847	0.00821918	0.000362158	0.00241898	0.00555808	0.000630844	0.000774161	0.00111955	0.00352046	0.00343046	0.00229021	0.0018404	0.00133028	0.0023606
G[T>A]G	0.000246044	6.38018e-05	0.0116046	0.0130989	0.00410918	0.000195107	0.000290188	0.000655827	2.22019e-16	0.00134979	0.0155994	0.000787935	7.30057e-05	2.21997e-16	0.000119169	0.00251033	4.69979e-05	0.000120053	0.00018704	0.00554828	0.000695088	0.000240983	0.0018312	0.000485764	0.00213098	0.000741965	0.0375172	4.68293e-18	0.00249092	0.0381941	0.000608082	0	7.16913e-05	0.00366054	9.85825e-05	0.00576697	0.0130987	0.000827362	0.00652725	0.00111961	0.00116971	0.00108022	0.00120951	0.00667087	0.00441059	0.00143013	0.00777169	0.00450096	0.00221056
G[T>A]T	0.000258046	6.28018e-05	0.0123049	0.00551954	0.00321936	0.000248136	0.000306199	5.58853e-05	0.0203017	0.00875866	0.0280989	0.00255979	0.000426033	0.000107998	0.000164234	0.00091512	0.000357984	0.000857376	0.00084018	0.0009657	0.00480061	0.00157989	0.00346227	0.000282862	0.00430197	0.000936956	0.00932429	5.78362e-18	0.00131048	0.0201969	0.000834113	0	0.000323961	0.00107016	0.000190966	0.000788585	0.00615938	0.00176077	0.00747685	0.00285901	0.00111972	0.00168035	0.00183926	0.00409053	0.00577077	0.00452041	0.00325071	0.00131028	0.00318081
G[T>C]A	0.00105019	2.23006e-16	0.00998399	0.00289976	0.0140972	0.00257141	0.000101066	0.00026593	2.22019e-16	0.000799877	0.00259989	0.00951921	0.00220017	0.0146998	0.000810152	0.0711093	0.000286987	0.0110048	0.0129028	0.00205936	0.000123016	5.94959e-05	0.000708465	0.000953536	0.00276126	0.22299	0.000721332	0.000218137	0.00370136	0.0174973	0.0835113	0	0.000490941	0.00108016	0.000934834	0.00452762	0.00913909	0.0122053	0.000108954	0.000564805	0.00233942	0.0307064	0.00169932	0.00747097	0.0060108	0.00606056	0.00582127	7.5016e-18	0.0270068
G[T>C]C	0.00190034	2.74008e-05	0.00564226	0.0011799	0.00793841	0.00111061	7.41481e-05	2.21942e-16	0.000423036	0.00231964	0.00261989	0.00977919	0.00628049	0.00532993	0.000861225	0.030404	0.000181992	0.00654287	0.0116025	0.00118963	0.0149019	0.0014999	0.00226149	0.00037082	0.00226103	0.0662969	0.00124057	0.000418262	0.00365134	0.00404937	0.0248034	0	0.000586929	0.00359053	0.000554902	0.00656655	0.00766923	0.00794347	0.000645728	0.0020293	0.00139965	0.0182038	0.00215913	0.0068909	0.00458061	0.00374034	0.00331072	0.0219047	0.00116029
G[T>C]G	0.00117021	0.000107003	0.0109044	0.0023698	0.014997	0.00245134	7.25471e-05	0.000528861	0.000232019	0.00256961	0.00280989	0.00630948	2.23017e-16	0.00137998	0.000561799	0.0415054	0.000194991	0.0110048	0.00595127	0.00427867	0.00357045	0.00100993	0.00398262	0.000952536	0.00406186	0.116995	0.000581267	4.68293e-18	0.00267098	0.0133979	0.0712096	0	0.000730912	0.00299044	0.000500911	0.0051273	0.00961904	0.20709	0.000439815	0.000190934	0.00183955	0.00983205	0.00186925	0.00574075	0.00565075	0.00351032	0.0032107	0.00120026	0.0173044
G[T>C]T	7.13127e-05	1.25004e-05	0.0102041	0.000754937	0.0136973	0.000906497	0.000811527	0.0068482	0.00707059	0.317951	0.00628975	0.00985918	0.00529041	0.0114998	0.000237338	0.0463061	2.2199e-16	0.0112049	0.00586125	0.00239926	0.00524066	0.0014699	0.00315207	0.00235885	0.000928425	0.132994	0.000834383	0.0007995	0.00399147	0.0141978	0.0552075	0	0.000850897	0.00155023	0.000444921	0.00468753	0.0128987	0.00971425	2.21907e-16	0.000420855	0.00264935	0.0400083	0.00304878	0.00751098	0.00731097	0.00389036	0.00239052	0.00051811	0.0111028
G[T>G]A	2.2304e-16	0.000209006	0.00442177	0.00059795	0.0025195	4.35238e-05	9.06588e-05	0.000322915	0.00248021	7.47885e-05	0.00130995	0.00829931	0.000204016	0.000480993	9.58363e-05	0.000412054	8.76961e-05	7.79342e-05	0.000203043	0.00090172	0.000495063	0.000280981	0.000870572	0.000635691	2.22102e-16	0.000285987	0.00159073	6.26392e-18	0.00107039	0.00554914	0.00137019	0	0.00115986	4.49066e-05	0.000187967	0.00030384	0.00114989	0.000581254	0.000364846	0.00175939	0.000184954	0.0118025	0.000503798	0.00333043	0.00249033	0.00180016	0.00114025	0.061113	7.68195e-18
G[T>G]C	2.2304e-16	0.000133004	0.00234094	0.000252979	0.00170966	0.000213117	0.000121079	0.000320915	0.00166014	2.22966e-05	0.000655973	0.00584951	0.000833065	0.000941987	2.22316e-16	0.000213028	2.2199e-16	0.00210092	0.000580124	0.000900721	0.000204026	0.00624957	3.70243e-05	0.000702658	6.65304e-05	0.000532975	0.000236109	8.69544e-05	0.00153056	1e-18	0.00121016	0	0.00192977	9.17134e-05	0.000352937	0.000871542	0.000739926	0.000637278	2.21907e-16	0.00506825	0.000312923	0.00686143	0.000938624	0.00580075	0.0022403	0.000950087	7.05153e-05	0.0756161	1.83046e-05
G[T>G]G	0.000348062	3.71011e-05	0.0109044	0.0024298	0.00529894	0.00027415	0.000325211	0.00240937	0.00603051	0.00379942	0.00396984	0.00396967	2.23017e-16	0.00172998	0.000130185	0.000496065	0.000425981	0.000781343	0.000347074	0.000674791	0.000835105	0.0014799	0.00583383	0.000509752	8.70398e-05	0.00021299	0.000450207	0.000157098	0.00313115	0.00868865	0.00235032	0	0.00312962	0.000770113	0.00137976	0.00254866	0.0030097	0.00542237	5.64762e-05	0.0040386	0.00152962	0.00983205	0.00215913	0.007721	0.00445059	0.00120011	0.000410089	0.241051	0.000103026
G[T>G]T	1.46026e-05	2.23006e-16	0.00583233	0.000251979	0.00234953	0.000787431	0.000835542	0.00182952	0.00675057	0.00683895	0.00128995	0.0193984	0.00221017	0.00515993	0.000154219	0.000165022	2.88987e-06	0.00225099	0.0013903	0.00238926	0.00724091	0.113992	0.00214141	0.000340834	0.00356163	0.00258988	1.9609e-05	5.78362e-18	0.00268099	0.00276957	0.00605082	0	0.0205975	0.00115017	0.000159972	0.00280852	0.000784922	0.000451197	0.000416824	0.00334884	0.000488879	0.0171036	0.00333866	0.00594077	0.00548073	0.00347032	0.0009202	0.0746159	0.00280071
T[C>A]A	6.58117e-05	0.000639018	0.00841337	0.0397967	0.00785843	0.000356195	0.000390253	0.00289924	0.00252021	0.0113983	0.0297988	0.0169986	0.0940073	0.000445994	0.000180256	0.00348046	0.0789965	0.000347152	0.0172037	0.0107966	0.000190024	1.23991e-05	0.0738485	0.00137933	0.00171078	0.00145993	0.00078436	0.00213133	0.029811	0.00693892	0.000938127	0	0.0142983	0.0452066	0.000695877	0.00185902	0.00972903	0.0119052	0.0042682	0.00526818	0.140965	0.00200042	0.0176929	0.00598078	0.0260035	0.0033103	0.00510111	0.00630134	0.000853216
T[C>A]C	0.00253045	0.000170005	0.0168067	0.0468961	0.00916817	0.000498273	0.000636413	0.00351907	0.0142012	0.00775881	0.025099	0.0024598	0.00997077	0.00379995	0.000939336	0.00288038	0.0293987	0.0243107	0.00581124	0.00586818	2.59033e-05	2.22985e-16	0.0436287	0.00112945	0.00337154	0.000235989	0.0017408	0.000664416	0.0519191	0.0101984	0.000630085	0	0.000451945	0.041106	0.000242957	0.00937507	0.00928907	0.00511223	0.00121949	0.023092	0.0771809	0.00159033	0.0114954	0.00786102	0.0210028	0.00172016	0.0540117	5.37115e-06	0.00222056
T[C>A]G	2.2304e-16	8.53025e-05	0.00141056	0.0108991	0.00229954	0.00020011	3.44223e-05	0.000299921	2.22019e-16	2.21966e-16	0.00189992	0.000444963	0.00116009	0.000572992	2.22316e-16	0.000505066	0.0120995	7.08311e-06	7.69165e-05	0.00148954	2.22028e-16	9.50935e-05	0.0127083	0.000284861	2.22102e-16	6.82968e-05	2.22102e-16	9.12571e-05	0.0097936	1e-18	0.000123017	0	0.000128984	0.0174025	8.25853e-05	0.000954498	0.00237976	0.0013706	2.21907e-16	9.46673e-05	0.0146964	0.00112023	0.00237905	0.00301039	0.00317042	0.000207019	0.000904197	3.07065e-18	3.1508e-07
T[C>A]T	5.88104e-06	0.000440013	0.00997399	0.0412966	0.0126975	0.00074741	0.000613398	0.00140963	0.00373031	0.000190971	0.0318987	0.0272977	0.670052	0.0815989	4.73674e-05	0.00235031	0.0354984	0.151066	0.00805172	0.00924713	0.000288036	0.00256982	0.12208	0.00137933	0.000904414	2.2199e-16	0.000396182	0.00024015	0.0228084	0.0245962	0.00140019	0	0.000556933	0.041106	0.000664882	0.00448764	0.00963904	0.0128056	3.19865e-05	0.0152947	0.207949	0.00244051	0.0277889	0.00655085	0.0241032	0.00590054	0.0273059	6.52139e-18	0.0166042
T[C>G]A	2.2304e-16	2.23006e-16	0.0133053	0.0035797	0.00780844	4.97272e-05	2.23145e-16	0.000253933	0.00194016	0.00373943	0.00146994	0.00268978	5.55043e-05	2.21997e-16	1.56222e-05	0.000969127	0.316986	1.97086e-05	0.000214046	0.00250922	0.00375047	0.000159989	0.00214141	0.00174915	0.000129059	0.000653969	0.00356164	0.000211132	0.00375138	0.00979848	0.00131018	0	0.000114986	0.000107016	0.000126977	0.000395792	4.70953e-18	0.0130057	6.1774e-07	0.00662771	0.00397902	0.00179037	0.00265893	0.0347045	0.0125017	0.0199018	0.000559122	4.42094e-06	0.00067317
T[C>G]C	0.000203036	9.87029e-05	0.0203081	0.00594951	0.00759848	0.000113062	5.09331e-05	0.00161957	0.00461039	0.00058791	0.00133995	0.00199983	2.23017e-16	2.21997e-16	0.000224319	0.0015502	0.0634972	0.000150066	6.12131e-05	0.00522838	0.000723091	6.17958e-05	0.00464305	0.00311848	2.82129e-05	0.00063097	0.0015207	0.000266167	0.00558205	0.00326949	0.000745101	0	0.000135984	0.006831	0.000985825	0.00291846	0.00109989	0.0025111	0.000139941	0.00562805	0.0024094	0.00111023	0.00217913	0.0367048	0.0141019	0.0142013	0.00187041	0.00103022	9.40238e-06
T[C>G]G	6.94123e-05	4.12012e-05	0.000520208	0.00182985	0.00170966	1.95107e-06	6.35412e-06	0.000363904	8.75074e-06	0.000872866	7.81968e-05	0.000403966	2.23017e-16	2.21997e-16	2.22316e-16	0.000214028	0.0137994	1.8308e-05	5.84125e-05	0.000438864	0.000380048	1.54989e-05	0.000899591	0.000440785	0.000124057	6.26971e-05	0.000381175	2.5616e-18	0.0013505	0.00205968	9.41127e-05	0	2.4597e-05	0.000897131	0.000105981	0.000415781	0.0009969	8.04352e-05	2.21907e-16	0.000154946	0.000301925	0.000860179	0.00109956	0.00962125	0.00174023	0.00193018	0.000207045	0.00147031	7.68195e-18
T[C>G]T	0.00156028	0.00118003	0.0235094	0.00337972	0.0124975	0.00012807	0.000281182	0.000713812	0.012301	8.52869e-05	0.00024899	0.00562953	5.45042e-05	4.33994e-05	0.000185263	0.0030504	0.368984	0.000321141	0.000174037	0.0284912	0.000283036	0.0014999	0.00318209	0.00160922	0.00112051	0.000686968	0.000388178	0.000466292	0.0040715	0.0163975	0.0022103	0	0.000142983	0.000336049	0.000108981	0.00423777	0.000691931	0.0201088	0.0021491	0.0211927	0.00758813	0.00255053	0.00394842	0.0507066	0.0237032	0.0446041	0.000381083	0.000251054	0.00259066
T[C>T]A	0.0011102	0.536015	0.0057623	0.00373969	0.0202959	0.0120066	0.238155	0.00660826	0.0173015	0.000206968	0.0050398	0.00426965	0.000366028	0.00272996	0.00979393	0.00552072	0.00692969	0.00354155	0.0265057	0.00635803	0.000532067	0.000107993	0.0114075	0.0438786	0.00807369	0.00359983	0.00159073	0.0153096	0.00240088	0.0110983	0.00329044	0	0.00483941	0.00639094	0.0979826	0.00747607	0.0247975	0.0147064	0.00185922	0.00295898	0.0106974	0.00402084	0.00644741	0.0038805	0.030004	0.0117011	0.00482105	3.72079e-05	0.00140035
T[C>T]C	3.73066e-05	0.0973028	0.0133053	0.00698942	0.0229954	0.0105058	0.331215	0.210944	0.0137012	0.00564913	0.00025199	0.00732939	0.00276021	0.0484993	0.158225	0.00264035	0.0044798	0.00013706	0.00956205	0.00367886	9.06114e-05	0.000603959	0.0114075	0.0249878	0.00919421	8.06962e-05	0.00132061	0.0436273	0.0122045	0.006449	0.00253034	0	0.0041295	3.61053e-18	0.133976	0.0245871	0.0386961	0.00317139	0.000288878	0.0125956	0.00685831	0.00250052	0.0072271	0.00528069	0.0231031	0.00647059	0.0327071	5.06108e-18	0.00225057
T[C>T]G	0.11002	0.0442013	0.000989396	0.000280977	0.0158968	0.0520285	0.0741481	0.0573849	4.64039e-05	0.00174973	4.16983e-05	0.00325973	0.00279022	0.436994	2.94419e-07	8.85116e-05	0.00118995	0.00532234	0.0212045	0.00301906	0.000177022	6.23957e-05	0.0118078	0.0043179	0.00264121	0.000316985	3.77173e-05	0.0028718	0.00269099	0.0140978	0.00263036	0	0.00173979	0.0144021	0.0146974	0.00840558	0.00984902	0.00385168	0.000299874	0.000764736	0.00388904	0.00343071	0.00346861	0.00486063	0.00212028	0.00492045	0.000364079	3.07065e-18	7.68195e-18
T[C>T]T	2.2304e-16	0.300009	0.00817327	0.0072194	0.0209958	0.00699383	0.107069	0.101973	0.00232019	0.0499923	0.00526979	0.00545955	0.0228018	0.127998	0.119169	0.0061208	0.00141994	0.000359158	0.00174037	0.0220931	0.000348044	0.000894939	0.00375247	0.0628694	5.00229e-05	7.30966e-05	2.22102e-16	0.0263165	0.00471173	0.0123981	0.00213029	0	0.00198976	0.00428063	0.0524907	0.0194897	0.0669933	0.00904395	0.00080766	0.00803722	0.00832794	0.00584121	0.00657736	0.00423055	0.022403	0.0115011	0.0151033	0.000836178	0.00302077
T[T>A]A	0.00672119	0.000422012	0.00651261	0.00887926	0.00630874	0.000454249	0.000356231	0.00323915	0.0154013	0.0166974	0.0114995	0.0259978	0.00204016	0.00305996	0.000186265	0.00375049	0.000295987	0.000200088	0.00109023	0.0122962	0.000119015	0.00118992	0.0108071	0.00049376	0.0120055	0.000256988	0.071833	7.77487e-18	0.00412152	0.0217966	0.00113015	0	0.000187977	0.000764112	0.00028195	0.00669648	0.000511949	0.00410179	0.271886	0.00429851	0.00245939	0.00245051	0.00243902	0.00669087	0.00713095	0.0806074	0.00850185	7.63163e-05	0.00696176
T[T>A]C	2.2304e-16	0.000192006	0.0105042	0.00430964	0.00413917	0.000114063	0.000389253	0.00223941	0.0342029	0.00122981	0.0194992	0.00184985	0.000360028	0.000664991	0.000202288	0.00645085	0.00023199	0.00173076	0.000157034	0.00466855	0.00570072	0.000241983	0.00273179	0.000474769	0.000318146	0.000794963	0.0236109	5.2733e-18	0.0032712	0.00340947	0.00126017	0	0.00124985	0.00193028	0.000240957	0.00374803	0.00244976	0.000217095	2.21907e-16	0.00529817	0.00101975	0.00113024	0.000927628	0.00369048	0.0103014	0.0143013	0.00226049	0.0009382	2.07052e-05
T[T>A]G	2.8005e-05	5.01014e-05	0.00671269	0.00953921	0.00478904	2.95162e-05	2.23145e-16	0.00169955	0.012201	0.00559914	0.0128995	0.0166986	0.000693054	7.0599e-05	0.000201286	0.00277036	0.000187992	0.000357157	0.000149032	0.00517839	0.00183023	2.22985e-16	0.00179118	0.000372819	0.000176081	9.84954e-05	0.0732337	0.000185116	0.00199073	0.0101984	0.000278038	0	0.000320961	0.000924135	0.000189966	0.00326828	0.00175982	0.000660289	0.00776673	0.00137952	0.000871785	0.00128027	0.000803678	0.00546071	0.00502067	0.00929085	0.00533116	5.1411e-05	5.02127e-06
T[T>A]T	0.0022504	0.000205006	0.0130052	0.00561953	0.00874825	0.000426234	0.000798518	2.21942e-16	0.279023	0.0272958	0.0378985	0.0169986	0.00529041	0.00151998	0.00067496	0.00525069	6.19973e-05	0.0018208	0.000475102	0.00715778	0.00198025	0.00130991	0.00710467	0.000672673	0.00671307	7.63964e-05	0.0301138	7.32458e-18	0.00219081	0.0144978	0.00131018	0	0.00571931	0.00120018	0.000700876	0.00887533	0.000710929	0.00272119	0.0459806	0.00540813	0.00269933	0.00195041	0.002499	0.0107014	0.0210028	0.0535049	0.00352077	8.77187e-18	0.0139035
T[T>C]A	0.000255045	2.23006e-16	0.0152061	0.0024098	0.0179964	0.00148081	0.0021514	0.00599842	0.0302025	0.0811875	0.00207992	0.0139988	0.000730057	0.00885988	0.000113161	0.0861113	2.2099e-05	0.00627275	0.00342073	0.012996	0.00209026	0.00105993	0.00180118	0.0012394	0.0138063	0.084196	0.00463213	7.77487e-18	0.00146054	0.0144978	0.0423057	0	0.00130984	0.00259038	0.000543904	0.00458759	0.00089691	0.0110048	0.00139941	0.000367873	0.00296927	0.0477099	0.00210915	0.00594077	0.0102014	0.0636058	0.00682148	0.000137029	0.019905
T[T>C]C	0.0033906	4.35013e-05	0.0089936	0.000502958	0.00970806	0.0010906	0.000596387	0.00172954	0.0209018	0.0142978	0.00263989	0.0135989	0.0051704	8.09989e-05	0.000467665	0.0463061	2.48989e-05	0.00288126	0.00592127	0.00366886	0.0153019	0.00109992	0.00618406	0.000552731	0.0166076	0.0547974	2.22102e-16	0.000190119	0.0030011	0.00740885	0.0314042	0	0.00204975	0.00150022	0.000285949	0.0102946	0.00121988	0.0125055	0.00623737	0.000821716	0.00227944	0.0451094	0.00218912	0.00644084	0.007551	0.0268025	0.00303066	0.0359077	0.0105027
T[T>C]G	0.000416074	0.000117003	0.00693277	0.00173986	0.0126975	0.00213117	0.000319207	0.003809	0.0129011	0.0227965	2.21991e-16	0.00930923	0.000363028	0.000667991	0.000155221	0.0400052	9.97956e-05	0.00431189	0.00132028	0.00722776	0.0023503	0.00120992	0.00326214	0.00107947	0.0120055	0.0275987	0.00122056	0.000302189	0.00203075	0.00488924	0.0303041	0	0.00140983	0.000379056	0.000202964	0.00400789	0.00168983	0.32014	0.00109954	0.000437849	0.00137966	0.0100021	0.00191923	0.00498065	0.0060108	0.0205019	0.00341074	2.78059e-05	0.0191048
T[T>C]T	0.00433077	3.5801e-05	0.0139056	0.000635947	0.0184963	0.00174095	0.000812527	0.00296922	0.0881074	0.0430934	0.00456982	0.0383968	0.00325025	2.50996e-05	0.000106151	0.0597078	0.000530977	0.00292128	0.00135029	0.0083874	0.0210027	0.000999931	0.00337222	0.00146928	0.0193088	0.0406981	2.22102e-16	7.32458e-18	0.00367135	0.0169974	0.0574078	0	0.00205975	0.00082212	0.000444921	0.0120936	0.000683932	0.00912399	0.00707702	0.00105963	0.00279931	0.0614128	0.00305877	0.00948123	0.0102014	0.0461042	0.00236051	0.00184039	0.0371094
T[T>G]A	2.2304e-16	1.67005e-05	0.0072529	0.000376969	0.00521896	0.000105058	0.000128083	0.000954748	0.0193016	0.000210968	2.21991e-16	0.0656945	0.00269021	0.0112998	8.52212e-05	0.00163021	0.000183992	9.92435e-05	0.000231049	0.00977697	2.22028e-16	1.21992e-05	0.000696458	0.00165919	2.22102e-16	0.000464978	0.00506233	0.000186116	0.000123045	0.00207968	0.00143019	0	0.0422949	0.000467068	0.000117979	0.00224882	2.25977e-05	0.000468205	2.21907e-16	0.00428852	0.000787805	0.0183038	0.00116953	0.00839109	0.00846113	0.0419038	0.00115025	0.000204044	7.68195e-18
T[T>G]C	5.51098e-05	7.0402e-05	0.00628251	0.000173986	0.00655869	0.000287157	0.000116075	0.00154959	0.0174015	0.000114982	0.00113995	0.00861928	2.23017e-16	0.00554992	6.73958e-05	0.00113015	2.2199e-16	0.00120053	0.000294063	0.00550829	0.000116015	0.0087494	0.00210138	0.00201902	2.22102e-16	0.000378982	0.000752346	5.2733e-18	0.00264097	0.00057891	0.00172023	0	0.0356957	9.93146e-05	9.63829e-05	0.00237875	0.000223978	0.000164072	2.21907e-16	0.00193933	0.000743816	0.0195041	0.000902638	0.00508066	0.0114015	0.0155014	0.00027406	0.00825176	7.68195e-18
T[T>G]G	0.000583103	9.54028e-05	0.00805322	0.00231981	0.00693861	0.000324178	2.23145e-16	0.00134964	0.00764064	0.000124981	0.00308988	0.0108991	2.16017e-05	0.00275996	0.000101144	0.000875115	3.66984e-05	0.00011405	0.000148032	0.00523837	0.000920116	0.00477967	0.00145095	0.00206899	0.00279128	0.000130994	0.00557256	0.000182114	0.00304112	0.00942854	0.00284038	0	0.0139983	0.000180026	0.000812856	0.00534719	0.000817918	0.000959419	0.00151936	0.00481833	0.000901777	0.0302063	0.00189924	0.00728095	0.00866115	0.0194018	0.00293064	0.0228049	0.000917232
T[T>G]T	2.2304e-16	2.23006e-16	0.0105042	0.000567953	0.0134973	0.00101055	8.29538e-05	0.00176953	0.0217018	0.000165975	0.00099596	0.0638947	0.0189015	0.0908987	5.5579e-05	0.00221029	1.88992e-05	0.000605266	0.00599128	0.0157951	0.00458058	0.121992	0.00516339	0.00422794	0.00151069	2.2199e-16	0.000595274	7.32458e-18	0.00396146	0.00786878	0.00945128	0	0.478942	0.000928136	0.00888842	0.00729616	0.000634937	0.00225098	0.000231902	0.00361875	0.00180955	0.0291061	0.00528788	0.0109014	0.0250033	0.0879081	0.00174038	0.00132028	0.00900228
[truncated: 23 more columns]
