# Supplementary material for: Somatic Genomic and Transcriptomic Changes in Single Ischemic Human Heart Cardiomyocytes
Source: Research Square preprint supplement (doi:10.21203/rs.3.rs-5875531/v1), 2025-01-30
Supplement: Supplementary file 10 [file ad71ab99d0e671b628d2569e.xlsx]

## Sheet: GO enrichment Control
Accession	Category	Term	Percent hits	P-value
GO:0051393	MF	alpha-actinin binding	7.14286	0.0153462
GO:0042805	MF	actinin binding	5.55556	0.0162173
GO:0055008	BP	cardiac muscle tissue morphogenesis	4.91803	0.00136748
GO:0060415	BP	muscle tissue morphogenesis	4.10959	0.00153382
GO:0048644	BP	muscle organ morphogenesis	3.75	0.00162127
GO:0001725	CC	stress fiber	3.07692	0.00160949
GO:0042641	CC	actomyosin	2.8169	0.00206468
GO:0032432	CC	actin filament bundle	2.8169	0.00187526
GO:0030018	CC	Z disc	2.29008	0.0038831
GO:0031674	CC	I band	2.06897	0.00417698
GO:1902414	BP	protein localization to cell junction	1.90476	0.0059173
GO:0007517	BP	muscle organ development	1.77515	3.73e-06
GO:0060538	BP	skeletal muscle organ development	1.76471	0.000350723
GO:0030016	CC	myofibril	1.71674	0.000769606
GO:0043292	CC	contractile fiber	1.65975	0.000804786
GO:0003231	BP	cardiac ventricle development	1.6	0.00691536
GO:0051015	MF	actin filament binding	1.47783	0.00681792
GO:0060048	BP	cardiac muscle contraction	1.45985	0.0335254
GO:0030017	CC	sarcomere	1.40845	0.00713318
GO:0007519	BP	skeletal muscle tissue development	1.25786	0.0077379
GO:0048738	BP	cardiac muscle tissue development	1.23457	0.00769893
GO:0003205	BP	cardiac chamber development	1.20482	0.0121806
GO:0060537	BP	muscle tissue development	1.18203	0.000160651
GO:0003007	BP	heart morphogenesis	1.16279	0.00694785
GO:0014706	BP	striated muscle tissue development	1.1583	0.00831407
GO:0006941	BP	striated muscle contraction	1.10497	0.0426754
GO:0061061	BP	muscle structure development	1.04322	4.14e-06
GO:0045216	BP	cell-cell junction organization	0.970874	0.0135554
GO:0016197	BP	endosomal transport	0.877193	0.0160009
GO:0009913	BP	epidermal cell differentiation	0.843882	0.012445
GO:0060047	BP	heart contraction	0.829876	0.0498674
GO:0099568	CC	cytoplasmic region	0.8	0.0295409
GO:0003730	MF	mRNA 3'-UTR binding	0.78125	0.00962929
GO:0003779	MF	actin binding	0.704225	0.0198462
GO:0030029	BP	actin filament-based process	0.642674	0.00131387
GO:1903530	BP	regulation of secretion by cell	0.542495	0.01901
GO:0008544	BP	epidermis development	0.536193	0.0314292
GO:0099512	CC	supramolecular fiber	0.509684	0.00267051
GO:0099081	CC	supramolecular polymer	0.505561	0.00279047
GO:0007507	BP	heart development	0.503356	0.0389616
GO:0051046	BP	regulation of secretion	0.495868	0.0221817
GO:0048729	BP	tissue morphogenesis	0.482315	0.0326326
GO:0005925	CC	focal adhesion	0.480769	0.0481962
GO:0030036	BP	actin cytoskeleton organization	0.435414	0.0427093
GO:0005509	MF	calcium ion binding	0.4329	0.0469955
GO:0005198	MF	structural molecule activity	0.432277	0.0364657
GO:0034330	BP	cell junction organization	0.403226	0.0302801
GO:0006417	BP	regulation of translation	0.389864	0.0479231
GO:0070161	CC	anchoring junction	0.344432	0.0387693
GO:0140352	BP	export from cell	0.339751	0.0473943
GO:0003729	MF	mRNA binding	0.336134	0.0497445

## Sheet: GO enrichment IHD
Accession	Category	Term	Percent hits	P-value
GO:0140033	MF	acetylation-dependent protein binding	8	0.00340016
GO:0070577	MF	lysine-acetylated histone binding	8	0.00340016
GO:0140693	MF	molecular condensate scaffold activity	6.66667	0.00375088
GO:0048026	BP	positive regulation of mRNA splicing, via spliceosome	6.45161	0.000665661
GO:0050685	BP	positive regulation of mRNA processing	5.55556	0.000958673
GO:0048024	BP	regulation of mRNA splicing, via spliceosome	2.85714	0.000859602
GO:0035064	MF	methylated histone binding	2.5641	0.0134596
GO:0140034	MF	methylation-dependent protein binding	2.5	0.0142764
GO:0042562	MF	hormone binding	2.40964	0.0114718
GO:0050684	BP	regulation of mRNA processing	2.3622	0.00139619
GO:0010494	CC	cytoplasmic stress granule	2.29885	0.0163825
GO:0006892	BP	post-Golgi vesicle-mediated transport	2.06186	0.0268611
GO:1903076	BP	regulation of protein localization to plasma membrane	1.88679	0.019968
GO:0043244	BP	regulation of protein-containing complex disassembly	1.75439	0.0378109
GO:0140030	MF	modification-dependent protein binding	1.7341	0.00716403
GO:1905475	BP	regulation of protein localization to membrane	1.69492	0.00597448
GO:0043484	BP	regulation of RNA splicing	1.68539	0.00622498
GO:0008286	BP	insulin receptor signaling pathway	1.63934	0.0304312
GO:1903313	BP	positive regulation of mRNA metabolic process	1.5544	0.00365592
GO:0006986	BP	response to unfolded protein	1.52672	0.0176514
GO:1904375	BP	regulation of protein localization to cell periphery	1.48148	0.030543
GO:0045727	BP	positive regulation of translation	1.48148	0.023937
GO:0009411	BP	response to UV	1.37931	0.027865
GO:0035966	BP	response to topologically incorrect protein	1.31579	0.0262708
GO:0005802	CC	trans-Golgi network	1.27119	0.014326
GO:0042393	MF	histone binding	1.24481	0.0217396
GO:0034250	BP	positive regulation of amide metabolic process	1.23457	0.0338162
GO:0036464	CC	cytoplasmic ribonucleoprotein granule	1.23457	0.0179229
GO:0035770	CC	ribonucleoprotein granule	1.15385	0.0203023
GO:0048193	BP	Golgi vesicle transport	1.06007	0.0201429
GO:0016887	MF	ATP hydrolysis activity	1.02828	0.0185513
GO:0005681	CC	spliceosomal complex	1.02041	0.0339086
GO:0000377	BP	RNA splicing, via transesterification reactions with bulged adenosine as nucleophile	1.00334	0.0114752
GO:0000398	BP	mRNA splicing, via spliceosome	1.00334	0.0114752
GO:0030674	MF	protein-macromolecule adaptor activity	0.997506	0.0107143
GO:0000375	BP	RNA splicing, via transesterification reactions	0.990099	0.0117337
GO:0017148	BP	negative regulation of translation	0.986842	0.0117958
GO:0034249	BP	negative regulation of amide metabolic process	0.903614	0.0154943
GO:1903311	BP	regulation of mRNA metabolic process	0.869565	0.0208662
GO:0098791	CC	Golgi apparatus subcompartment	0.847458	0.0372821
GO:0007018	BP	microtubule-based movement	0.819672	0.04846
GO:1901653	BP	cellular response to peptide	0.815217	0.0384842
GO:0003730	MF	mRNA 3'-UTR binding	0.78125	0.0405108
GO:0060090	MF	molecular adaptor activity	0.743494	0.0289797
GO:0008380	BP	RNA splicing	0.678733	0.0384861
GO:0006397	BP	mRNA processing	0.641026	0.0445975
GO:0071417	BP	cellular response to organonitrogen compound	0.630915	0.0420295
GO:0000139	CC	Golgi membrane	0.620155	0.0327299
GO:0051668	BP	localization within membrane	0.610687	0.0423519
GO:1901699	BP	cellular response to nitrogen compound	0.60241	0.0487677
GO:0016772	MF	transferase activity, transferring phosphorus-containing groups	0.58548	0.0376205
GO:0007017	BP	microtubule-based process	0.583431	0.0377692
GO:0003729	MF	mRNA binding	0.504202	0.0446711
GO:0006518	BP	peptide metabolic process	0.430571	0.0478631
